# Supplementary material for: Evolutionary rate analyses of orthologs and paralogs from 12 Drosophila genomes
Source: HighWire-hosted journal article supplement (doi:10.1101/gr.6249707), 2007-11-07
Supplement: supplement_revision.pdf [file supplement_revision.pdf]

# Supplemental information

## Detailed Methods

### Transcript prediction pipeline

The principal problem in prediction by homology is the selection of a template sequence. Alternative transcripts and paralogous genes in both *D. melanogaster* and or in the target species result in cases in which a single *D. melanogaster* transcript can be aligned to several candidate regions in the target species and, vice versa, a candidate region might be matched to several transcripts. The pipeline solves these problems by (1) selecting a representative transcript from each *D. melanogaster* gene and (2) pre-selecting likely pairings of orthologous transcripts and candidate regions and processing these first. Paralogous transcripts and variant transcripts are then predicted in subsequent steps.

The pipeline runs on GNU/Linux (<http://www.gnu.org>, <http://www.kernel.org>) and is controlled by a set of python (<http://www.python.org>) scripts. Results are stored in a relational database (<http://www.postgresql.org>).

The transcript prediction pipeline falls into four steps corresponding to the section subheadings below: (1) Pre-processing of template sequences, (2) identification of transcript containing loci, (3) prediction of transcripts in such loci, and (4) post-processing and classification of transcript predictions.

#### Step 1: Pre-processing

We cluster into genes those *D. melanogaster* transcripts that share at least one exon with identical exon boundaries. For each gene, the longest unspliced transcript is chosen as its representative; all others are designated as variants. The set of *D. melanogaster* representative transcripts is required for steps 2 and 3.

A set of 163 sequences templates were removed from the input list as they appear to be associated with transposable elements (repeatmasker and manual annotation). The genes involved were: CG10598, CG10598, CG11231, CG11458, CG12454, CG12462, CG12683, CG12749, CG12852, , CG12912, CG1294, CG13033, CG13235, CG13291, CG13591, CG13673, CG13785, CG14148, CG14191, CG14410, CG14460, CG14494, CG14503, CG14519, CG14560, CG14578, CG14975, CG15036, CG15166, CG15381, CG15494, CG15690, CG16901, CG16937, CG17506, CG17618, CG17702, CG17742, CG1840, CG1903, CG2042, CG2175, CG2175, CG30126, CG31483, CG32015, CG32231, CG32606, CG32616, CG32710, CG32711, CG32781, CG32788, CG32821, CG33236, CG33237, CG33238, CG33239, CG33240, CG33241, CG33242, CG33243, CG33244, CG33245, CG33246, CG33247, CG33267, CG33269, CG33270, CG33271, CG33272, CG33500, CG3894, CG40032, CG40043, CG40096, CG40103, CG40119, CG40122, CG40128, CG40138, CG40154, CG40156, CG40166, CG40167, CG40177, CG40182, CG40192, CG40221, CG40224, CG40241, CG40251, CG40264, CG40267, CG40315, CG40317, CG40322, CG40341, CG40342, CG40343, CG40346, CG40367, CG40373, CG40376, CG4038, CG40383, CG40396, CG40400, CG40409, CG40410, CG40442, CG40473, CG40484, CG40496, CG40497, CG41040, CG41065, CG41098, CG41104, CG41114, CG41118, CG41119, CG41122, CG41124, CG41132, CG41135, CG41141, CG4268, CG4345, CG5079, CG5172, CG5386, CG5812, CG6900, CG7105, CG7552, CG9106, CG9106, CG9983, CG40090, CG11260, CG9843, CG40265, CG40236, CG41059, CG40295,

#### Step 2: Genome scan

The second step produces candidate transcript-containing regions from within the eleven newly sequenced genome assemblies. The amino acid sequences encoded in the *D. melanogaster* representative

transcripts are masked for low complexity regions using SEG (Wootton 1994, default options). These masked peptide sequences are then aligned against the unmasked genomes using Exonerate in heuristic mode with sensitive search options (options: “model=p2g, forcectag=TRUE, bestn=200, maxintron=50000, proteinwordthreshold=3, proteinhspdropoff=5, proteinwordlen=5, score cutoff=50”). These settings produce a multitude of matches between template amino acid sequences and genomic regions. The level of sensitivity for identifying matches was found to be comparable to that of TBLASN (see section on Benchmarking below). Adjacent matches within 50kB associated with the same template are merged and their scores added. Matches of aggregate scores of less than 80 are discarded as representing likely spurious alignments. The result of this step is a list of pairs of transcripts and matching genomic regions.

### ***Step 3: Transcript prediction***

The third step produces transcript predictions by aligning the template amino acid sequence to its paired genomic region using the Genewise mode of Exonerate. When the genomic region to be searched is large, this is computationally expensive. At the same time, paralogous *D. melanogaster* sequences in the input set and in the target genome will give rise to a multitude of redundant predictions. Consequently, the pipeline tries to minimize the numbers of alignments that are performed by first processing pairs between orthologous pairs. Only then it will process the remaining paralogous pairs to properly account for lineage specific duplications. Finally, variant transcripts as opposed to representative transcripts are aligned to genomic segments, where its representative transcript matched previously.

Pairs of matching template transcripts and genomic regions are predicted in three passes. Each pass selects a subset of pairs of transcripts and genomic regions to predict with exonerate (see next section).

The first pass processes likely ortholog matches by discarding all low scoring matches. For a given template these are defined as having an alignment coverage, score or percent identity to the query that is less than half of the best coverage, score or percent identity obtained for any predictions from this particular *D. melanogaster* sequence.

The second pass excludes all pairs of templates and genomic regions that overlap with the genomic locations of transcripts predicted in the first pass. The purpose of this step is to predict paralogous sequences.

The third pass predicts transcripts which are variants to those predicted in passes one and two. For each prediction in pass one and two, variant as opposed to representative template transcripts (see step 1) are aligned to the same genomic region as the representative template transcript. This pass does not make use of priority lists.

### **Prediction of transcripts from a list of pairs of aligned templates with genomic regions**

The resulting collection of pairs between templates and various genomic regions is transformed into a collection of priority lists. The priority lists are used to solve the problem of paralogous *D. melanogaster* queries that will align to the same region containing a homologous gene in the target genome. The priority list ensures, that the likely ortholog sequence is selected for transcript prediction before attempting prediction with paralogous sequences.

Priority lists are built from matches encompassed within the same genomic region. All templates in each priority list are first grouped into clusters on the basis of sequence identity (at least 60%) and alignment coverage (at least 50%). Each cluster thus groups homologous template transcripts that align to a particular genomic region. Each cluster is sorted by decreasing alignment score between the template and genomic prediction. The templates are thus arranged in a priority list, such that more similar templates are used before less similar ones to prediction transcript. As soon as a satisfactory prediction is returned, less similar template sequences are skipped. At most, five templates are in each priority list.

Templates are aligned in order of their priority. A prediction is defined as being satisfactory, if its exon structure corresponds to the exon structure of the template. To this end, exon boundaries of the prediction are mapped onto the template sequence. The exon structure of multi-exon genes is considered to be conserved if at most one exon is missing and/or at most one exon boundary has shifted. Single exon predictions are considered to be conserved if the template is a single exon protein and the prediction aligns to at least 80% of this template.

In order to reduce computation time, the size of the genomic region presented to Exonerate is determined first by another search with Exonerate in heuristic mode, but using more sensitive settings than used in the initial genomic scan (options: `proteinwordthreshold=5`, `proteinhspdropoff=5`, `proteinwordlen=3`). The region is extended with 50kb at either end, unless the template's ends are aligned, in which case only 0.3kb are added.

Transcripts are predicted from template peptide sequences in the final alignment using Exonerate's genewise mode (options: `"exhaustive, subopt=FALSE, forcecstag=TRUE, subopt=FALSE"`). Even though Exonerate permits the detection of suboptimal matches, this capability was switched off as it led to excessive running time. Instead, if a match is found, adjacent regions of 100kB on either side are checked for local duplications. The local search for paralogs is repeated, until no more matches are found.

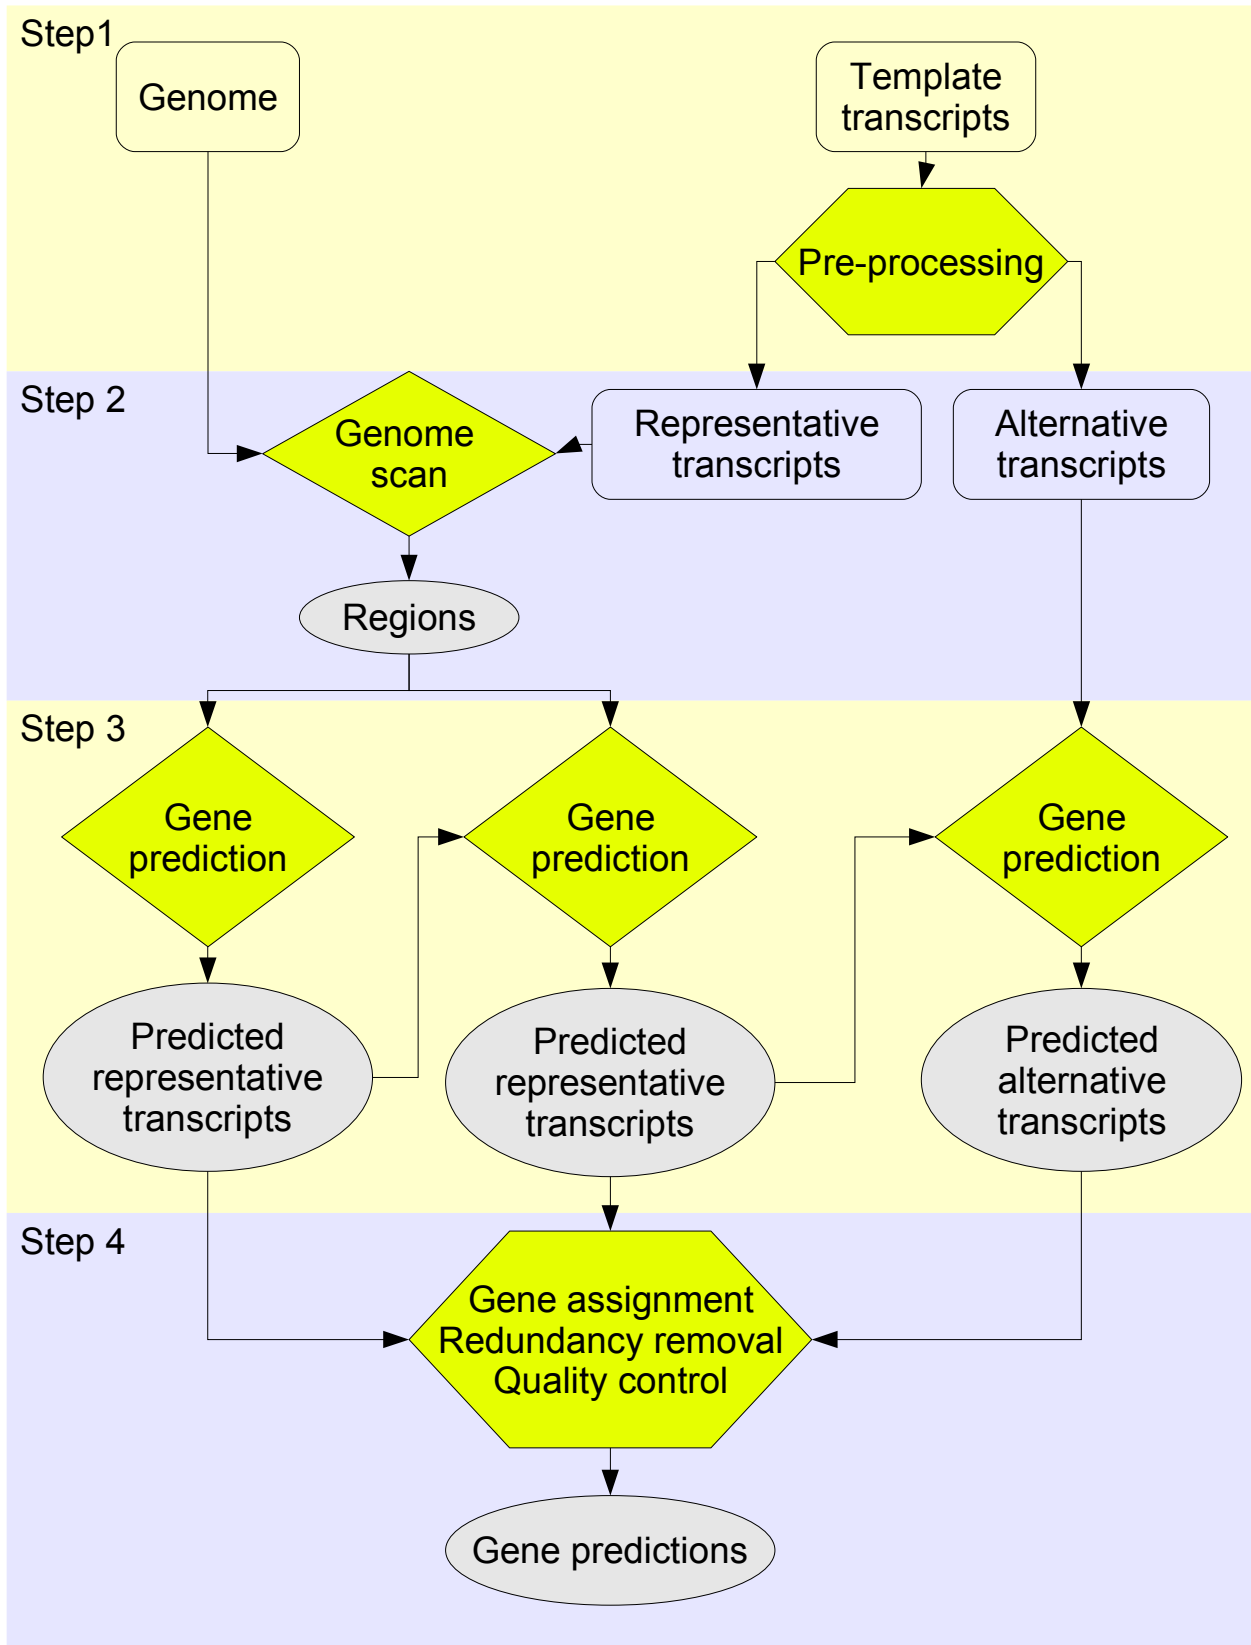

Figure S1: The four steps of the transcript prediction pipeline. See text for further details.

## Post-processing

The pipeline attempts to predict transcripts in a genomic region until it identifies a satisfactory prediction (as defined using a set of heuristics, see below). In multi-gene families several equally suitable templates result in identical or highly similar predictions. The resultant set of predictions thus needed to be filtered to reduce redundancy. Similarly, inappropriate templates might have been used for prediction. Such spurious predictions have to be removed since they are most often invalidated by a better matching, orthologous prediction. To this end, an index is assigned to each prediction that is intended to reflect whether it is orthologous, for all exons, to the template.

This quality index aggregates the following attributes: alignment coverage of the template, presence of frameshifts and/or stop-codons, and conservation of exon structure when compared to its template. Indices are ranked to present an approximate indicator of the prediction quality. Briefly, full length predictions are preferred over incomplete predictions (namely, less than 80% alignment coverage of the template); predictions without in-frame stop-codons and frameshifts are preferred over those containing frame disruptions; and finally, predictions with matching exon boundaries between template and prediction are preferred over those with shifted exon boundaries or those with inserted or deleted introns.

Redundant and spurious predictions are removed by applying a set of heuristic rules. Briefly, predictions are sorted by quality index, length and alignment score. Once a prediction is accepted, other overlapping predictions satisfying one or more of the following rules are removed: (1) the predicted peptide sequence is identical to the template sequence or a part thereof; (2) the prediction is of a lower quality index and the sequences are essentially identical (better than 98% sequence identity, fewer than 20 gap positions); (3) the prediction is a fragment and its sequence is more than 80% identical to the accepted prediction; and (4) the prediction has a lower quality index and spans the better ranked prediction on either strand. These rules permit alternative transcripts per locus but disallow truncated transcripts. An additional filter removes two other types of predictions, those sharing exons between adjacent duplications, and those predictions without conserved gene structure that span other predictions with conserved gene structure, but do not contain overlapping exons.

These rules remove dubious predictions that are invalidated by a better prediction. Nevertheless, those predictions of low confidence but showing no clear favorite are all retained, which reflects the difficulty of predicting that particular transcript.

A particular problem arises from genes that are duplicated locally. These can result in spurious transcripts containing exons from adjacent genes. In most cases, exon boundaries between duplicates are conserved and thus all transcripts will possess the same quality index. We found no heuristic to reliably winnow out these spurious transcripts while keeping true alternative transcripts. Instead, we defer identification of these transcripts until after the orthology assignment.

Transcript predictions are combined into genes if they share at least one identical exon. Partial overlap is allowed for single exon genes and terminal exons, although at least 80% nucleotide overlap is required. The quality index of a gene is assigned as the best quality index of its transcripts.

## Quality indices for transcripts

| Quality index                    | fragment | pseudogene | conserved | partially conserved | Prediction multi-exon | Query multi-exon |
|----------------------------------|----------|------------|-----------|---------------------|-----------------------|------------------|
| <b>Genes</b>                     |          |            |           |                     |                       |                  |
| CG: conserved gene               | N        | N          | Y         | Y                   | Y                     | Y                |
| SG: single exon gene             | N        | N          | ?         | ?                   | N                     | N                |
| PG: partially conserved gene     | N        | N          | N         | Y                   | Y                     | Y                |
| RG: retrotransposed gene         | N        | N          | ?         | ?                   | N                     | Y                |
| UG: not conserved gene           | N        | N          | ?         | ?                   | ?                     | ?                |
| <b>Pseudogenes</b>               |          |            |           |                     |                       |                  |
| CP: duplicated pseudogene        | N        | Y          | Y         | ?                   | Y                     | ?                |
| SP: single exon pseudogene       | N        | Y          | ?         | ?                   | N                     | N                |
| PP: partially conserved pseudo   | N        | Y          | N         | Y                   | Y                     | ?                |
| RP: processed pseudogene         | N        | Y          | ?         | ?                   | N                     | Y                |
| UP: not conserved pseudogene     | N        | Y          | ?         | ?                   | ?                     | ?                |
| <b>Fragments</b>                 |          |            |           |                     |                       |                  |
| SF: single exon fragment         | Y        | N          | ?         | ?                   | N                     | N                |
| CF: conserved fragment           | Y        | N          | Y         | ?                   | ?                     | ?                |
| PF: partially conserved fragment | Y        | N          | N         | Y                   | ?                     | ?                |
| UF: not conserved fragment       | Y        | N          | ?         | ?                   | ?                     | ?                |
| BF: pseudogenic fragment         | Y        | Y          | ?         | ?                   | ?                     | ?                |

Table S1: Classes of predictions. The quality index of a gene is determined by a set of flags. The flags are set to true or false according to the following criteria:

- *Fragment: True, if alignment between template and prediction covers less than 80% of the template.*
- *Pseudogene: True, if the prediction contains frame-shifts and disruptions. Frame-shifts and disruptions are allowed in dubious exons, which exceptionally low sequence similarity to the template when compared to other exons in the transcript.*
- *Conserved: True, if all exon boundaries are conserved*
- *Partially conserved: True, if at least one conserved exon is present.*
- *Prediction/Query multi-exon: the prediction/query has multiple exons.*

The priority of quality indices is: CG > PG > SG > RG > CP > PP > SP > RP > CF > PF > SF > UG > UP > UF > BF

## Orthology assignment

Orthology assignment was performed in two stages. First, pairwise orthology was computed in pairwise species comparisons using PhyOP (Goodstadt and Ponting 2006). Then, multiple orthology assignments involving more than two species were inferred from clusters derived from the graph of pairwise orthology relationships.

In our terminology, we follow the definitions of (Fitch 1970, Remm et al. 2001): orthologs are related through speciation, while paralogs are related through an intra-genome duplication event. In-paralogs duplicated after the speciation of the two species being compared, whereas out-paralogs duplicated before speciation. Strict orthologous pairs are those with only a single copy in each genome, while degenerate orthologous pairs contain in-paralogs for at least one species.

### *Pairwise orthology assignment*

For each pair of genomes, amino acid sequences of full length predictions (>80% coverage of template) are collated. Each amino acid sequence is aligned against every other sequence using BLASTP (Altschul et al. 1997). Alignments with an E-value of more than  $10^{-5}$  or covering less than 75% of the smaller sequence are removed. The remaining alignments are weighted according to a normalized bit score

$$s_{ij} = 1 - \frac{\max(s'_{ij}, s'_{ji})}{\min(s'_{ii}, s'_{jj})}$$
, where  $s'_{ij}$  is the bit score for a BLASTP alignment between sequence  $i$  and sequence  $j$ .

Briefly, the PhyOP pipeline then constructs an initial transcript phylogeny based on the UPGMA method and then optimizes branches in the tree using KITSCH (30 iterations, down weighting large distances by a power of 3) modified from the PHYLIP package (Felsenstein 1989). Orthologs are assigned to members of the smallest subtree containing leaves of both species. Nodes closer to the root than a node joining branches of orthologs are considered to be orphans. Depending on the tree topology, several predictions in one species (in-paralogs) can be assigned to the same ortholog in another species.

Distances based on amino acid substitutions can be quickly derived from BLASTP alignments, but in some circumstances they can be an unreliable guide for orthology assignment (Goodstadt and Ponting 2006). We thus verified pairwise orthology relationships using the numbers of synonymous substitutions per synonymous site  $d_s$  calculated with CodeML from the PAML package (Yang 1997) based on the pairwise BLASTP alignments calculated previously. Only orthologous and in-paralogous pairs were considered, thereby reducing computational time. The resultant set of alignments was submitted to another iteration of PhyOP orthology assignment.

Orthologous genes were defined based on orthologous transcripts. The  $d_s$  value between genes was defined as the minimum  $d_s$  value estimated between transcripts.

### *Multiple orthology assignment*

In theory, orthologs across a multitude of species should be easily grouped through pairwise orthology relationships. In practice, however, inaccurate estimation of the phylogeny causes errors in pairwise orthology assignment, which leads to the grouping of out-paralogs. Here we use a graph clustering approach to define orthologs across multiple species (see also Tatusov et al. 1997 and Alexeyenko et al. 2006).

The set of pairwise orthology relationships defines an undirected graph with transcripts as vertices and orthology and in-paralogy relationships as edges. We assume that spurious orthology assignments will be identifiable as inconsistencies in the graph.

Both inconsistent edges and inconsistent vertices are removed. Let  $N_a$  denote the set of direct neighbors

of vertex  $a$ . Inconsistent edges link vertices  $a$  and  $b$ , where the proportion of shared neighbors between vertices  $a$  and  $b$   $\frac{|N_a \cap N_b|}{|N_a \cup N_b|}$  is less than 0.3. Inconsistent vertices are those with a clustering coefficient

$C_a, C_a = \frac{|E_a|}{|N_a| * (|N_a| - 1)}$  of less than 0.5, where the set  $E_a$  contains all edges between vertices in the

neighborhood of  $a$ . These thresholds were chosen heuristically following consideration of a few benchmark cases. Orthologous groups are given by the connected components of the filtered graph.

The filtering procedure introduces a potential bias towards removing ancient duplication events. Ancient duplication events result in two clusters of densely connected components with few edges in between the clusters. The between-cluster edges might be wrongly identified as inconsistent. This occurs, given the chosen thresholds, if there are more than four in-groups than out-groups for the ancient duplication event. Given the phylogeny of the *Drosophila* species, this should only occur on the two branches leading to the speciation points of *D. willistoni* and *D. pseudoobscura*/*D. pseudoobscura* and will not affect our analysis of paralogs in the *D. melanogaster* group.

### **Multiple alignment**

Evolutionary rate estimates were inferred from multiple alignments of orthologous and paralogous sequences within an orthologous cluster. Multiple alignments were built for all coding sequences in each orthologous group using Dialign (Morgenstern 1999), for clusters containing fewer than 50 sequences, and Muscle (Edgar 2004) for clusters containing greater than 50 sequences. For Dialign, the nucleotide sequences were internally translated into peptide sequences. All transcripts per gene were provided for the alignment, which resulted in occasional spurious alignment of incompatible exons from alternative transcripts of the same gene. In such cases multiple alignment columns joining incompatible exons were split into compatible groups.

For codon based rate analysis, in-frame stop codons and frameshifts in transcripts from the newly sequence genomes were removed from the multiple alignment. Codons were assigned across the multiple alignment using *D. melanogaster* sequences (assumed to be pseudogene-free) as internal references.

Poorly aligned regions were pruned with Gblocks (Castresana 2000) using default parameters except that alignment columns with up to 50 percent gap characters were tolerated. This step retained the majority of codons (75% of all multiple alignments retained at least 90% of codons), while it removed more than half the codons in only 3% of multiple alignments. Pairwise  $d_N$  and  $d_S$  values of multiply aligned sequences were estimated using CodeML from the PAML package (Yang 1997).

### **Assignment of orthologous transcripts**

Orthologous groups might contain several transcripts per gene and duplicated genes. For orthology based analyses, it is desirable to work with a set of ortholog transcripts which discount duplications and alternative transcripts. To this end, a reference set of orthologous transcripts was derived from the multiple alignment of each orthologous group. This reference multiple alignment contains at most one entry from each species.

The reference multiple alignment of orthologous transcripts was built using an approach similar to that using reciprocal best BLASTP hits (Tatusov et al. 1997), except that transcripts within a multiple alignment are clustered by components in a graph of reciprocal minimum  $d_S$  values. We use the reciprocity of minimum  $d_S$  values as a criterion for orthology inference, assuming that problems due to misalignment and paralogy will increase  $d_S$  values and thus will have the least effect on our approach. If several transcripts from the same species and gene are in the same cluster, the transcript with the highest quality index is retained and all others removed.



## Rate computation among orthologs

Evolutionary rates were computed for orthologous sequences based on multiple alignments of orthologous transcripts. All analyses are based on 6,375 multiple alignments of orthologous transcripts (see above) where each of the 12 species is represented. Synonymous and non-synonymous substitution rates were estimated using CodonML from the PAML package (Yang and Nielsen 2002). In all measurements, codon frequencies were estimated from nucleotide frequencies at each codon position (model F3x4). No correlation among sites was assumed and the transition/transversion ratio was allowed to vary.

## Reconciliation of gene trees with species tree

We briefly checked the congruence between the topology of gene trees and the species tree. Pairwise synonymous and non-synonymous substitution rates were estimated using CodonML and phylogenetic trees were built using FITCH (Felsenstein 1989) and the number of gene trees supporting a particular branch in the species phylogeny were recorded. In later analyses, we set the topology of gene trees to the species phylogeny, regarded it as constant and only estimated branch lengths.

## Branch specific $d_N/d_S$ values

Species tree branch specific  $d_N/d_S$  values were calculated using the CodonML method from the PAML package (Yang and Nielsen 2002). 200 randomly chosen multiple alignments of orthologous transcripts were concatenated and submitted for evolutionary rate estimation. Further parameters were: (1) no rate heterogeneity over sites; and (2) codon frequencies given by nucleotide frequencies at each codon position. The log likelihood value obtained was compared to the log likelihood estimated assuming the same  $d_N/d_S$  ratio for all branches. The experiment was replicated 20 times. The assumption of homogeneous  $d_N/d_S$  across all branches was rejected in a likelihood ratio test with 14 degrees of freedom in all instances (Felsenstein 1981). The species *D. willistoni*, *D. persimilis* and *D. sechellia* were excluded from the analysis, the former because of its exceptional G+C content compared to the other species (A. Heger & C. P. Ponting, submitted) and the latter two because of their genes' high similarities to those from *D. pseudoobscura* and *D. simulans*, respectively.

## Identification of sites under positive selection

Positively selected sites were predicted using the program SLR (Massingham and Goldman 2005). The analysis was restricted to the five species *D. melanogaster*, *D. simulans*, *D. yakuba*, *D. erecta* and *D. ananassae*, whose divergences are substantially less than those prone to substitution saturation effects.

Multiple alignments were rigorously pruned of regions that are, or could be, badly aligned. In compositionally biased regions, the signal for aligning such positions on the translated sequences is effectively lost, while it might still be retained in the untranslated codons. As a result, non-homologous characters might be aligned which affect synonymous and non-synonymous substitution rate estimates. We removed compositionally biased regions rigorously by first masking each individual amino acid sequence with seg (Wootton 1994, default parameters). Masked residues in a single sequence were then propagated to all residues in an alignment column.

Sites under positive selection are commonly defined by a significant excess of non-synonymous substitutions over synonymous substitutions giving a  $d_N/d_S$  ratio,  $\omega$ , of larger than 1. Neutral sites have an  $\omega$  of about 1, while sites under purifying selection have an  $\omega$  of less than 1. Parsimony (Suzuki and Gojobori 1999) and maximum likelihood models (Nielsen and Yang 1998) exist to predict site-specific synonymous and non-synonymous substitution rates. However predictions of sites under positive selection are often contentious (Suzuki and Nei 2004, Wong et al. 2004, Yang 2006), especially when they are embedded in neutrally evolving sequence. Here we have adopted a practical approach.

SLR was run with default parameters. Positive sites were collected at a 95% significance threshold. Sites at indel positions were removed. The multiple testing correction by SLR was not applied. Instead we filtered proteins with positive sites based on their over-representation by such sites. Our null hypothesis is that all sites identified to be under positive selection are instead false positives and thus that they are distributed uniformly over all possible sites. We only report proteins whose numbers of putative sites under positive selection are larger than expected by chance from a binomial distribution with a significance threshold of 0.01.

## Analysis of gene duplications

Duplication and speciation events can be inferred from the reconciliation of a gene tree with a known species tree. This process relies on a gene tree whose topology is determined accurately. This becomes increasingly difficult to estimate for diverse species sets owing to gene absences, and problems of reliably estimating divergence rates over long distances due to saturation of substitutions. Here we adopt a protocol that takes account of these issues by constructing a tree incrementally.

Multiple alignments were masked for compositionally biased regions. Note, here we used the multiple alignments involving all sequences in each orthologous cluster. The topology of the tree was derived from the consensus tree based on 100 bootstrap samples. Trees were built using the Neighbor-joining method employing the F84 distance (NEIGHBOR, Felsenstein 1989) and the consensus tree was chosen using the extended majority rule (CONSENSE, Felsenstein 1989).

Branch lengths of the tree were estimated based on pairwise synonymous substitution rates ( $d_s$ ; estimated using CodeML). Saturated pairwise distance estimates larger than  $d_s = 5.0$  were discarded. In order to minimize the influence of long-range distance estimates that tend to be unreliable due to saturation, branch lengths of the tree were estimated in three stages. First, branch lengths for the whole tree were determined from all pairwise distances using the program FITCH from the PHYLIP package. This allows for unequal evolutionary rates among branches. Secondly, sub-trees with a maximum distance to leaf of 1.5 were fitted separately to optimize branch lengths within the *D. melanogaster* subgroup, where codon usage bias is homogeneous and neutral rates estimates can be estimated reliably (A. Heger & C. P. Ponting, submitted). Thirdly, sub-trees with a maximum distance of node to leaf of 0.5 were fitted; in this step, the topology was re-estimated to resolve alternative transcripts. Missing values were treated in all steps as replicates of 0. Trees were rooted at the mid-point.

The species tree was reconciled with the gene tree using the RIO method (Zmasek and Eddy 2002), which assigns speciation and duplication events to nodes in the gene tree. Node types in RIO were extended to include lineage-specific duplications and alternative transcripts. Deletions in speciation and duplication events were permitted, if the deletion was confined to only one branch. If a duplication event encompassed all species, it was recorded as an out-paralogous duplication. All other events were recorded as inconsistencies.

Dating duplication events rests on the assumption of a molecular clock (Zuckerkandl and Pauling L 1962) such that synonymous substitutions on all branches occur at a constant rate. However, codon usage bias has varied since the split between the *D. melanogaster* subgroup and the *D. virilis*, *D. mojavensis* and *D. grimshawi* lineages (A. Heger & C. P. Ponting, submitted). Thus neutral substitution rates are expected to vary both between gene families and within gene families. We circumvented these problems by (1) restricting our analysis to the *D. melanogaster* subgroup, in which codon usage bias has remained largely unchanged (A. Heger & C. P. Ponting, submitted), and by (2) normalizing duplication events between trees.

*D. pseudoobscura* and *D. persimilis* sequences were used as an outgroup to root gene trees and all in-groups in the melanogaster subgroup were submitted to branch length estimation by maximum likelihood using CodeML from the PAML package. A model allowing no site variation and assuming constant  $d_N/d_S$

across all branches was chosen to maintain a small number of parameters.

We employed two methods to normalize the date of duplication events. Firstly, the largest distance of a duplication event to any of its children was divided by the total height of the tree, which was given by the median distance to root of all leaves excluding pseudogene and outgroup sequences. The resultant date of a duplication event was expressed in percentage distance from the tip with the most recent duplications having a rate of 0%. Secondly, we dated a duplication event by its relative position on a particular branch on the species tree. Here, duplications are either close (0%) or distant (100%) from the most recent speciation or extant species in terminal lineage-specific branches.

Counting gene duplications has many pitfalls due to the species asymmetry in the gene prediction methodology and the unfinished status of these genomes. Duplications in the pair of *D. yakuba* and *D. melanogaster* serve as an illustration of the latter. We found 169 duplication events for genes of *D. melanogaster* with respect to *D. yakuba* and 575 duplication events for *D. yakuba* with respect to *D. melanogaster*. Most of these duplications were, however, due to unplaced contigs in the newly sequenced *D. yakuba* genome assembly. If we removed all entries that are located on chromosome assemblies containing the suffixes “random” or “U”, the numbers reduce to 83 and 96, respectively. The majority of the remaining duplications were specific to a chromosome arm (82 and 94, respectively) and most were within 100kb of one another (77 and 93, respectively). The same reduction was observed for longer evolutionary distances (*D. melanogaster* versus *D. pseudoobscura* (**Table S2**), but no data are available for the extant clade of *D. mojavensis*, *D. grimshawi* and *D. virilis*. An alignment based measure for detecting spurious duplications failed, as sequencing or assembly errors produce gene copies that are indistinguishable from recent duplications. In our analysis we removed all predictions located on unplaced contigs in the genomes, where this information was available, namely for *D. melanogaster*, *D. yakuba*, *D. simulans* and *D. pseudoobscura*.

## Gene Ontology (GO) Analysis

GO assignments (Ashburner et al. 2000) for *D. melanogaster* genes were obtained from ENSEMBL. GO categories were mapped onto generic GO slim categories (version from 6/12/2005). For a given list of genes from a set of background genes, P-values of over- or under-representation were calculated using a hypergeometric distribution controlling for a false discovery rate of 5% (Boyle et al. 2004).

## ***Additional results***

This section contains further analyses, figures and tables that are referred to in the main paper.

### **Conservation of gene structure**

A gene structure of a prediction different to that of its template can be due to evolutionary processes or to artefacts. To examine these alternatives, we selected pairs of orthologous transcripts from two different genomes (see below for orthology assignment) that were predicted from the same template and where one was predicted to have a fully conserved exon structure in a species distantly related to *D. melanogaster* and the other a partially conserved gene structure in a species more closely related to *D. melanogaster*.

We parsimoniously assume such differences to be due to sequence or method artefacts.

We tested this assumption by examining 40 predicted genes in *D. yakuba* with degraded gene structure, whose orthologs in *D. willistoni* show full conserved gene structure. Of these 40 genes, 21 genes encompass sequence gaps and can readily be explained as artefacts. Of the remaining 19 genes, three genes have one inserted intron, four have a deleted intron, eight have one or more deleted terminal exons, three have one exon of conserved boundaries, but low sequence identity, and in one gene, the exon boundary has moved 28 nucleotides.

The lengths of inserted introns all are of a multiple of three bases, suggesting that they are artefacts arising either from a deletion in the *D. melanogaster* template or insertion of coding sequence in *D. yakuba*. Missing terminal exons are due to gaps, contig boundaries or over-predicted exons in *D. melanogaster* transcripts. For example, we find that the non-predicted exon of CG3250 aligns upstream to the predicted ortholog in *D. yakuba*, albeit without a starting methionine codon and at lower identity than the other exons.

We repeated this analysis with all genomes that are more distantly related to *D. melanogaster* than *D. yakuba*. Combining the results, we estimate that at least 290 of 1038 genes (28%) with changed exon structure are due to sequence artefacts. This is a lower bound estimate, as it relies on gene structure conservation in species distantly related to *D. melanogaster*, whereas gene structure does evolve over time, albeit slowly. The proportion of artefacts in other species are similar (*D. simulans*: 49%, *D. sechellia*: 28%, *D. ananassae*: 29%, *D. pseudoobscura*: 26%, and *D. persimilis*: 25%) except for a comparatively low value for *D. erecta* (15%) and a very high value for *D. simulans* (49%). Both these rates can be explained by the exceptionally low and high number of gaps in the two genomes, respectively (**Table 1**).

## Coverage and percent identity of predictions

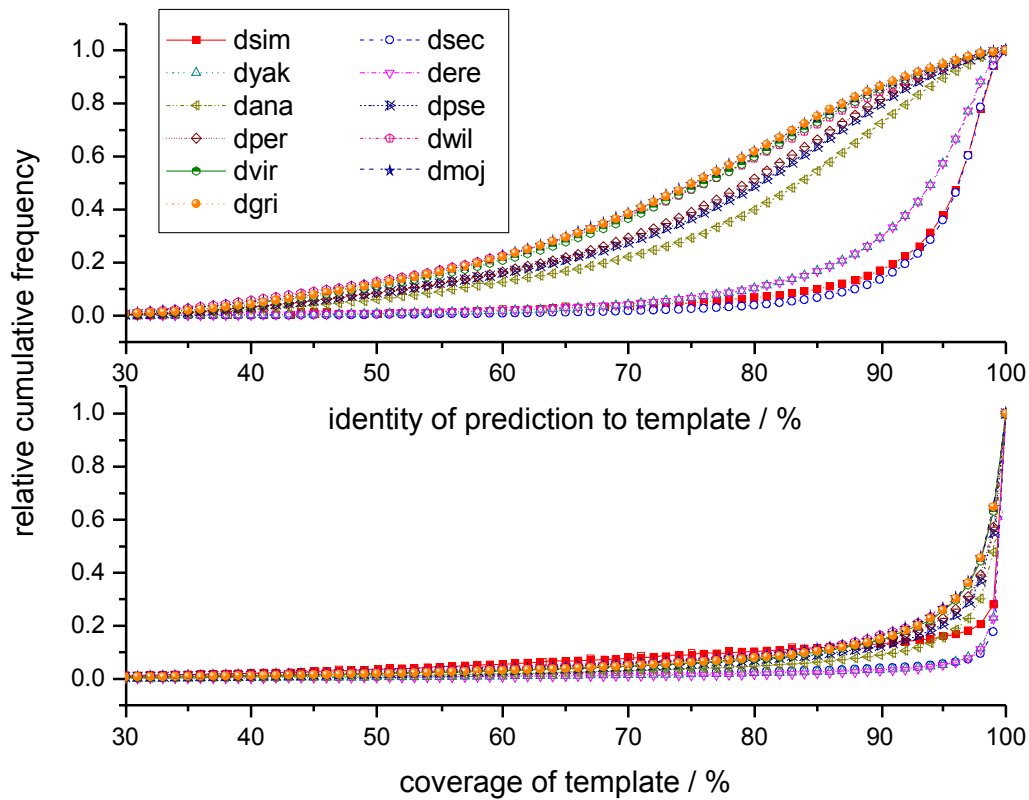

Figure S2: Cumulative histograms of coverage and percent identity between template transcript and their prediction. Only the prediction of highest similarity to the template is shown. Most templates have a prediction that aligns from end to end. The similarity of templates and predictions drops for the further divergent species, but sequence similarity for most templates is in general above 80%, thus showing that prediction by homology in this set of genomes is feasible.

## Separation of orthologs and paralogs in pairwise normalized bitscore distances

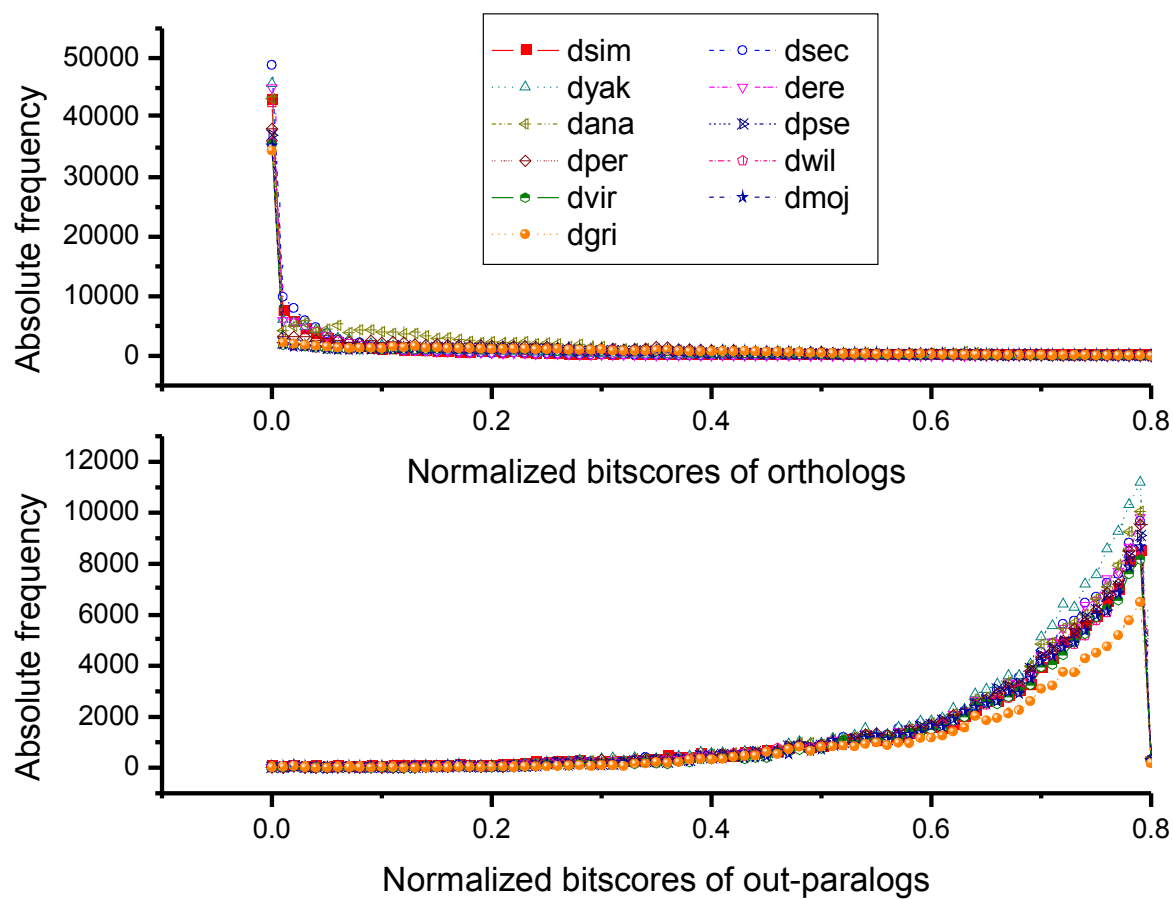

*Figure S3: Bitscores of orthologs and paralogs do not overlap, indicating that the orthology assignment procedure is consistent with the similarity measure used.*

## Length of syntenic blocks

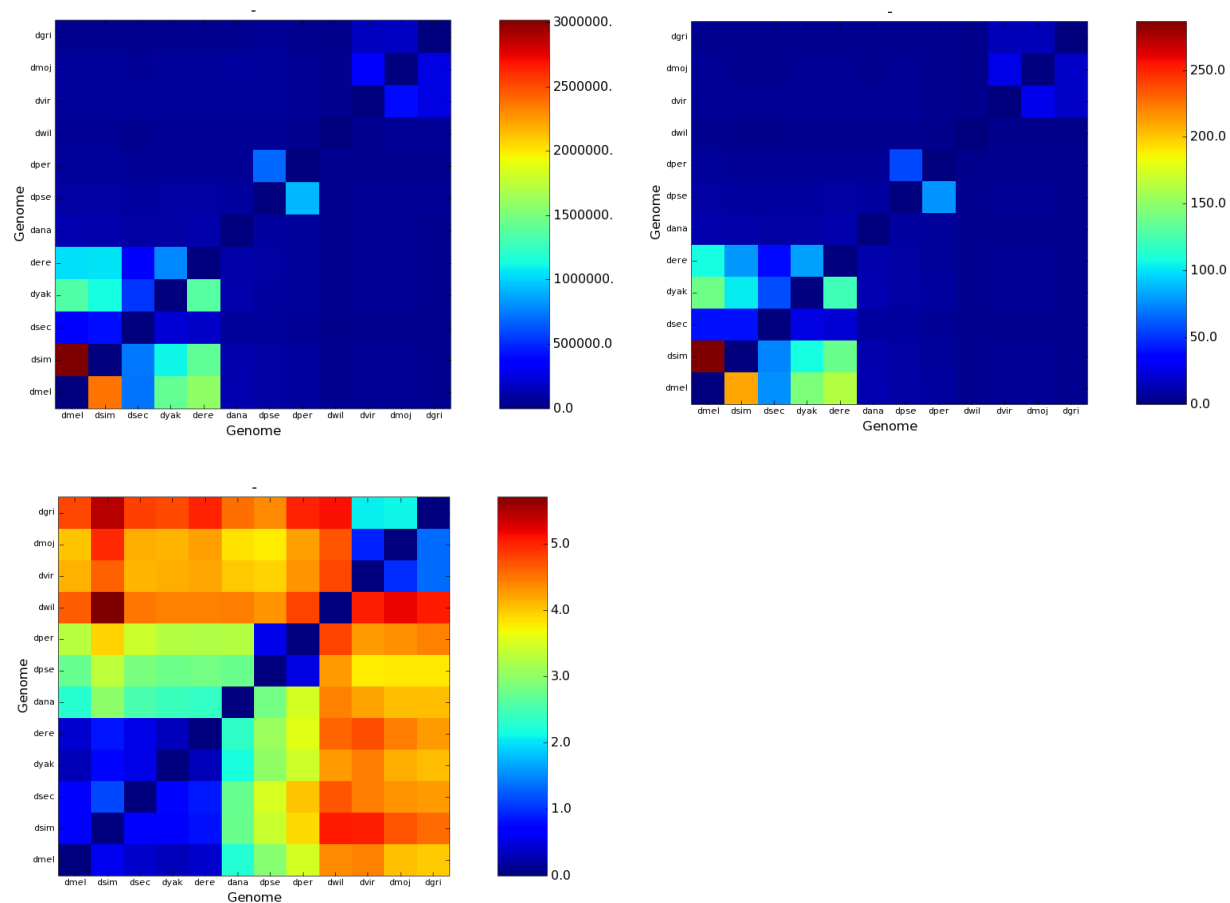

*Figure 4: Top row: Average length of syntenic blocks (left) and average number of genes (left) per syntenic block in each pairwise comparison between the 12 fly species. Bottom row: Percent of orthologous gene pairs that conflict with synteny.*

## Synonymous substitution rates

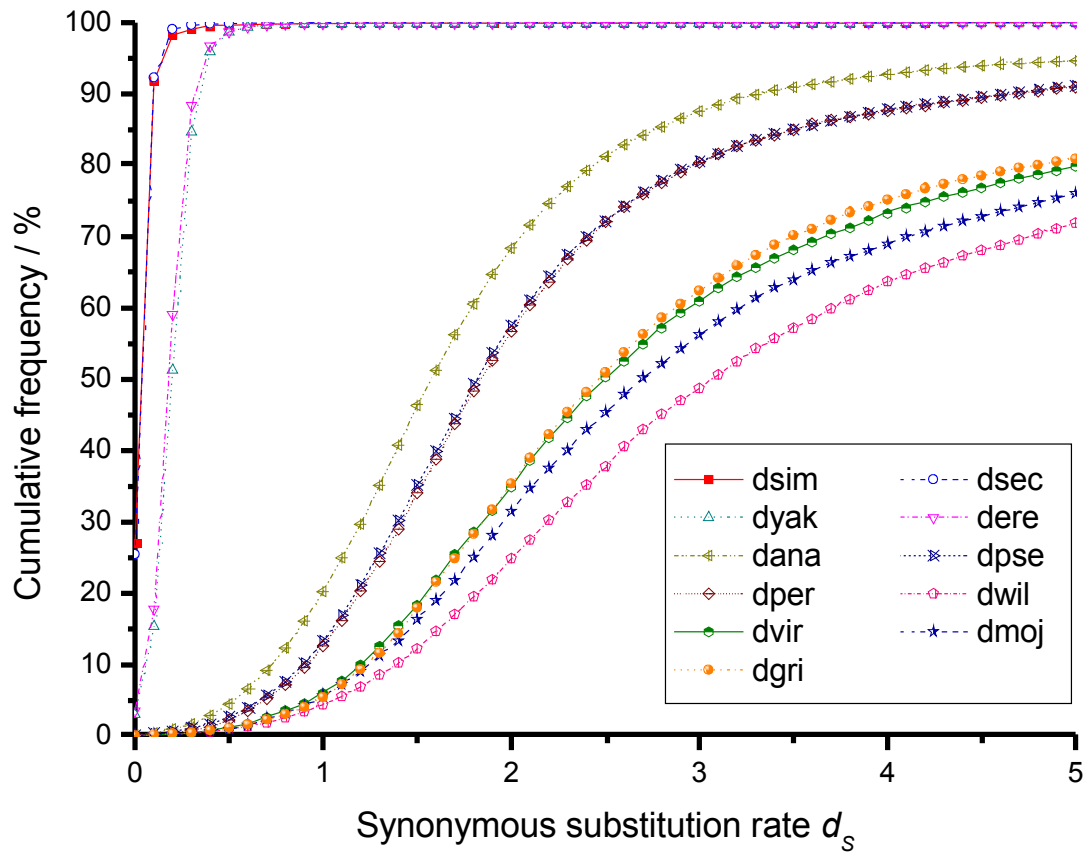

Figure S5: Synonymous rates can be computed between *dmel* and all other species. Shown here are cumulative frequencies for orthologs in each genome when compared to *D. melanogaster*. We argue that even the divergent species of *D. mojavensis*, *D. virilis*, *D. grimshawi*, and *D. willistoni* can be used for synonymous rate computation.



## Trees of paralogous sequences

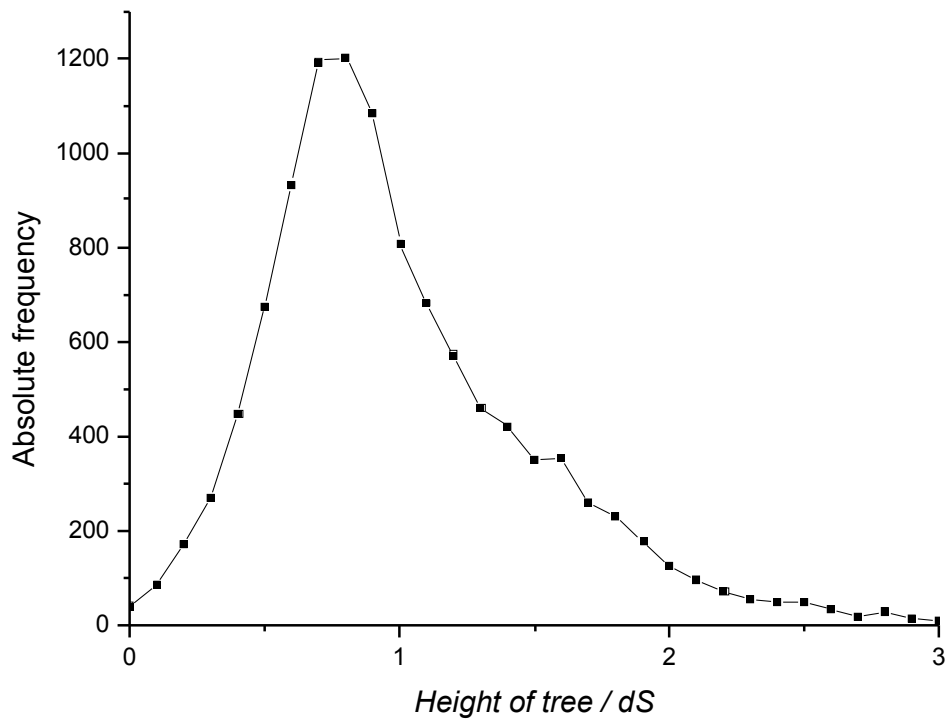

Figure S6: Heights of trees vary considerably between orthologous groups. Shown here are the heights of trees in the *D. melanogaster* subgroup rooted with *D.pseudoobscura*/*D.persimilis*. The height of the tree is given as the median distance of leaf to root. Only genes are considered for the determination of the tree height, excluding pseudogenes.

## Branch length variation across gene trees

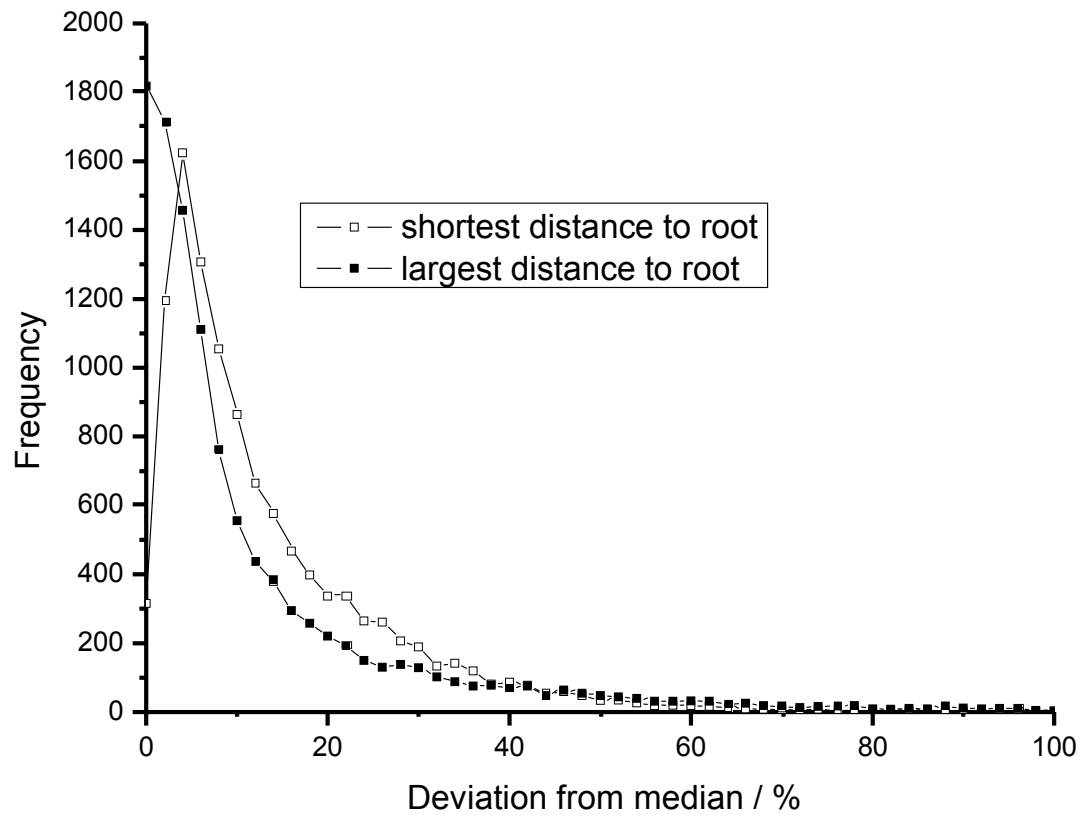

*Figure S7: Distribution of the minimum/maximum distance to root of branches. Distances are normalized by the tree height (median distance of leaves to root). Most trees contain largely contemporaneous tips.*

## Branch length variation across species

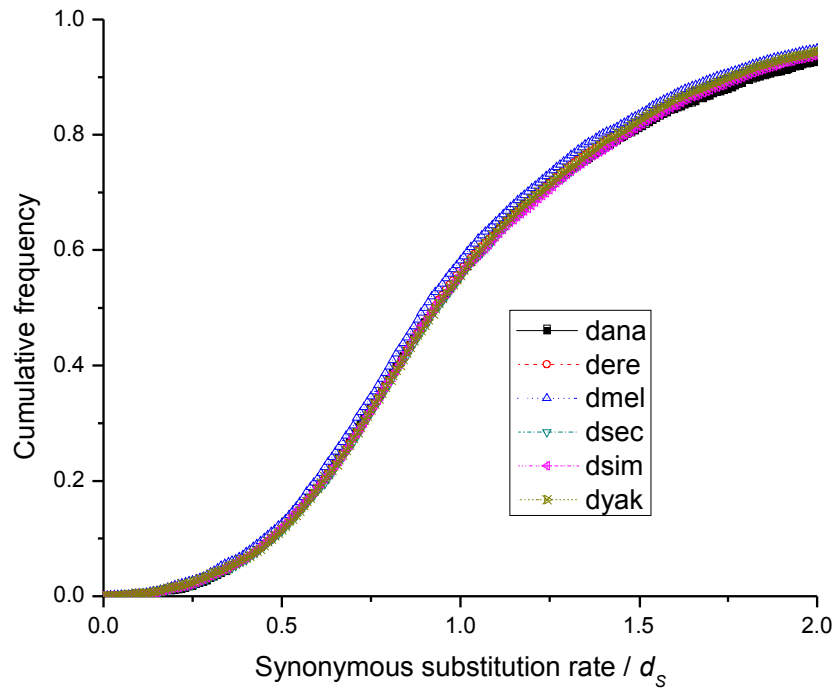

*Figure S8: Individual species show no particular trend towards long or short branches. Shown here is the distance of leaves to root for each species in  $d_s$  for each species over all gene trees.*

## Normalized duplication rate for terminal branches

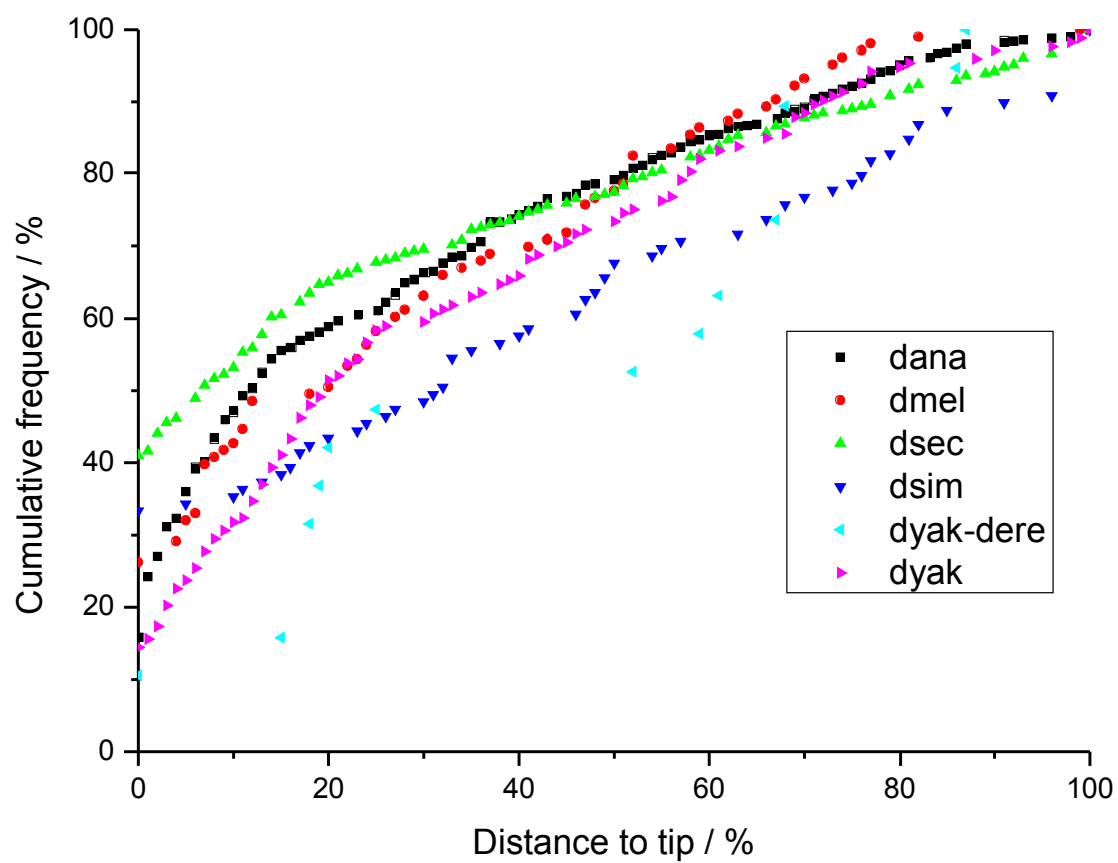

Figure S9: Lineage specific duplications in the *D. melanogaster* subgroup have often been near-contemporaneous or, previously, at a relatively uniform rate.

## Normalized duplication rates for internal branches

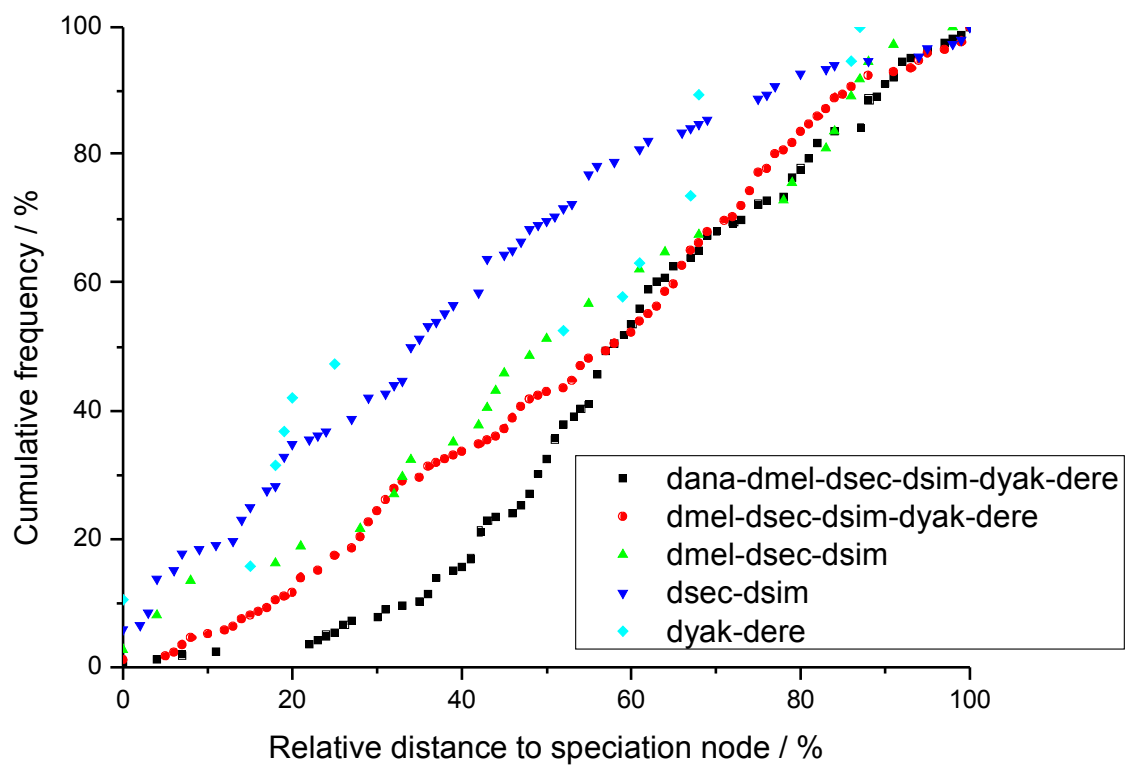

Figure S10: Gene duplications in internal branches in the *D. melanogaster* subgroup have occurred at uniform rates. Distance are based on  $d_s$  values and normalized by the branch of the reconciled species where a particular duplication has occurred.

## Normalized duplication rates for genes and pseudogenes

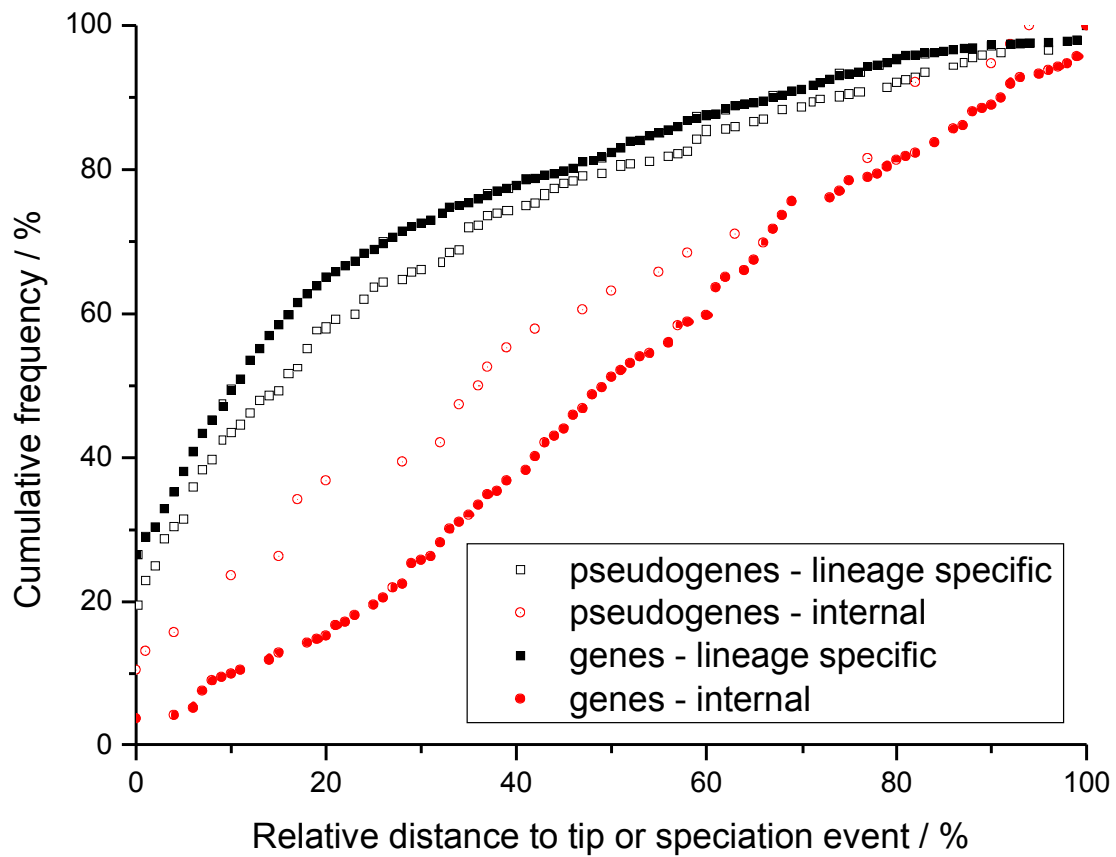

Figure S11: Duplication rates normalized by branch length within the *D. melanogaster* subgroup (see above). Duplication rates are shown for nodes in the tree producing exclusively genes and exclusively pseudogenes (filled and open symbols, respectively). Duplications in internal species-tree branches leading to pseudogenes in all extant species are rare and restricted to the branches leading to the sibling species *D. erecta*/*D. yakuba* and *D. simulans*/*D. sechellia*

## The effect of unplaced contigs on duplication counts

| <i>Species pair</i>                    | <i>All</i> | <i>Placed</i> | <i>Cis</i> | <i>Local</i> |
|----------------------------------------|------------|---------------|------------|--------------|
| <i>D. melanogaster/D.yakuba</i>        | 146/811    | 120/119       | 118/112    | 87/109       |
| <i>D. melanogaster/D.pseudoobscura</i> | 341/323    | 146/169       | 137/110    | 105/100      |
| <i>D.yakuba/D.pseudoobscura</i>        | 435/248    | 76/129        | 68/85      | 64/74        |

Table S2: Unplaced contigs contribute strongly to counts of duplications. Placed duplications involve genes which are not on unplaced contigs. Cis duplicated genes are on the same chromosomal arm, local duplications are within 100kb of one another. The numbers represent duplication events in one genome compared to the other.

## The benefit of multiple orthology assignment

| <i>Species</i>          | <i>Pairwise</i> | <i>Multiple</i> | <i>Increase</i> |
|-------------------------|-----------------|-----------------|-----------------|
| <i>D. simulans</i>      | 11566           | 11593           | 100.2%          |
| <i>D. sechellia</i>     | 12809           | 12848           | 100.3%          |
| <i>D. yakuba</i>        | 12920           | 12971           | 100.4%          |
| <i>D. erecta</i>        | 12883           | 12974           | 100.7%          |
| <i>D. ananassae</i>     | 11681           | 11802           | 101.0%          |
| <i>D. pseudoobscura</i> | 10829           | 10998           | 101.6%          |
| <i>D. persimilis</i>    | 10474           | 10637           | 101.6%          |
| <i>D. willistonis</i>   | 10035           | 10162           | 101.3%          |
| <i>D. virilis</i>       | 10399           | 10590           | 101.8%          |
| <i>D. mojavensis</i>    | 10163           | 10340           | 101.7%          |
| <i>D. grimshawi</i>     | 10148           | 10307           | 101.6%          |

Table S3: The number of *D. melanogaster* genes in orthology relationships increases after multiple orthology assignment. Shown are the number of *D. melanogaster* genes with orthologs in the other 11 species after pairwise and multiple orthology assignment.



## Lineage specific duplications in *Drosophila melanogaster*

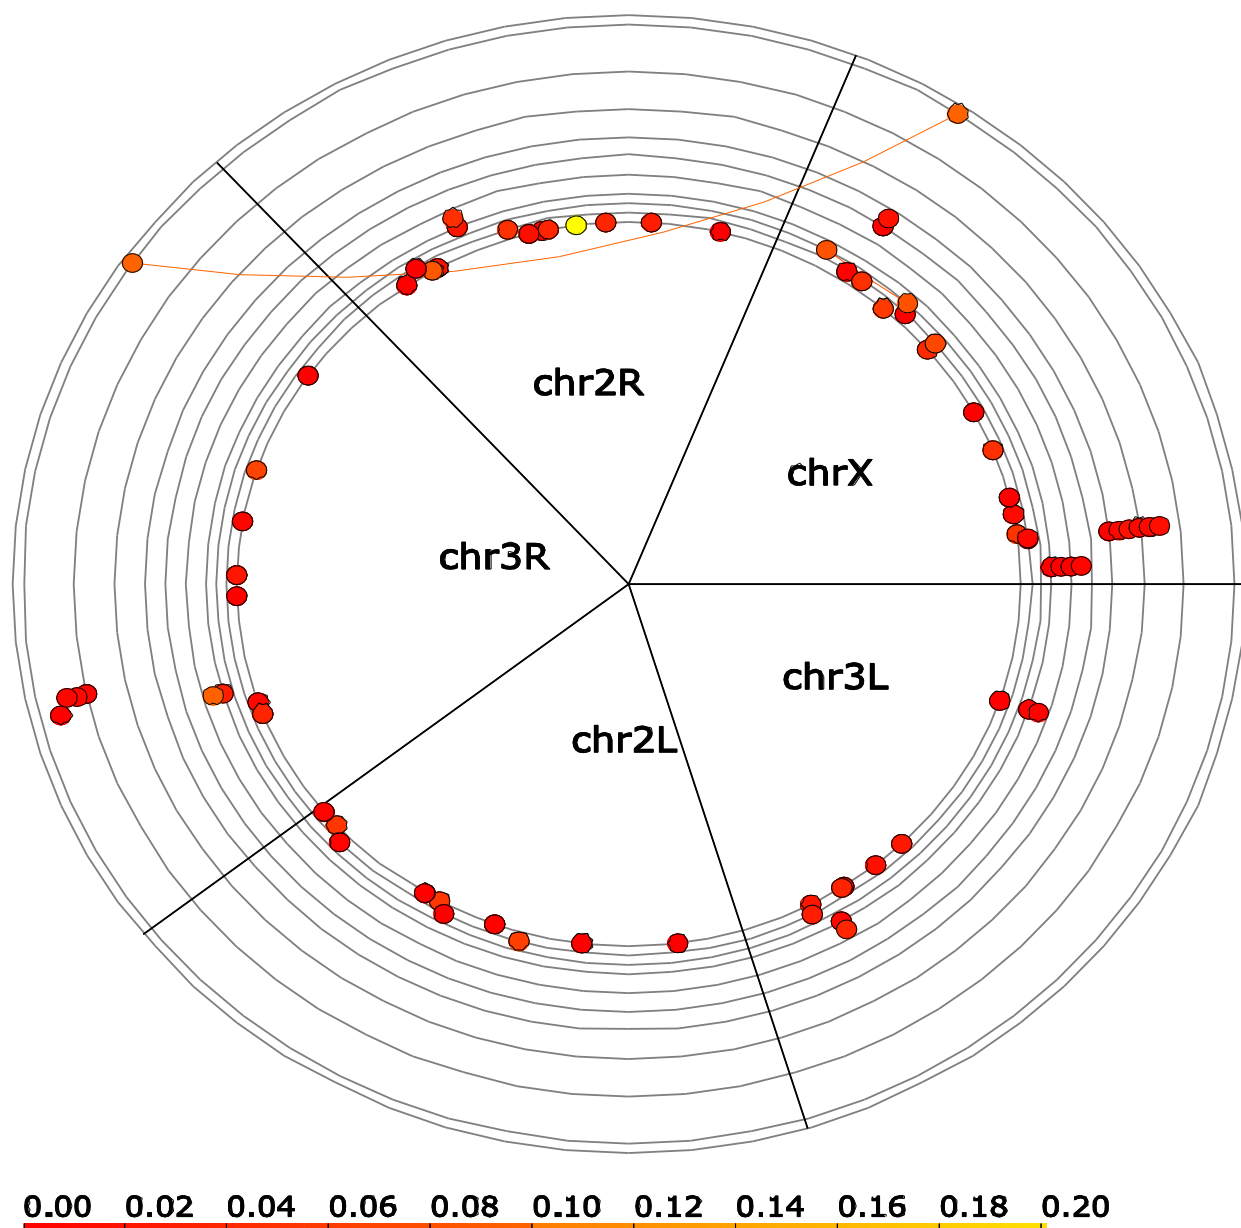

Figure S12: Shown here are lineage-specific duplications in *D. melanogaster* for the four large chromosomal arms. Each duplication is represented by two dots connected by an arc. These are colored by their divergence ( $d_s$  value, see scale). Pseudogenes are colored gray. Genes are placed on the chromosomal arms according to their physical location. Most duplications are local such that only a single dot is visible. Overlapping or very close duplications are stacked on top of each other. Multiple duplications within the same gene family are stacked on top of each other in the outer rings whose increased radius reflects the family size. Each member of a multi-gene family is connected to all other members resulting in a connected path of arcs within a family.

## Lineage specific duplications in *D. simulans*

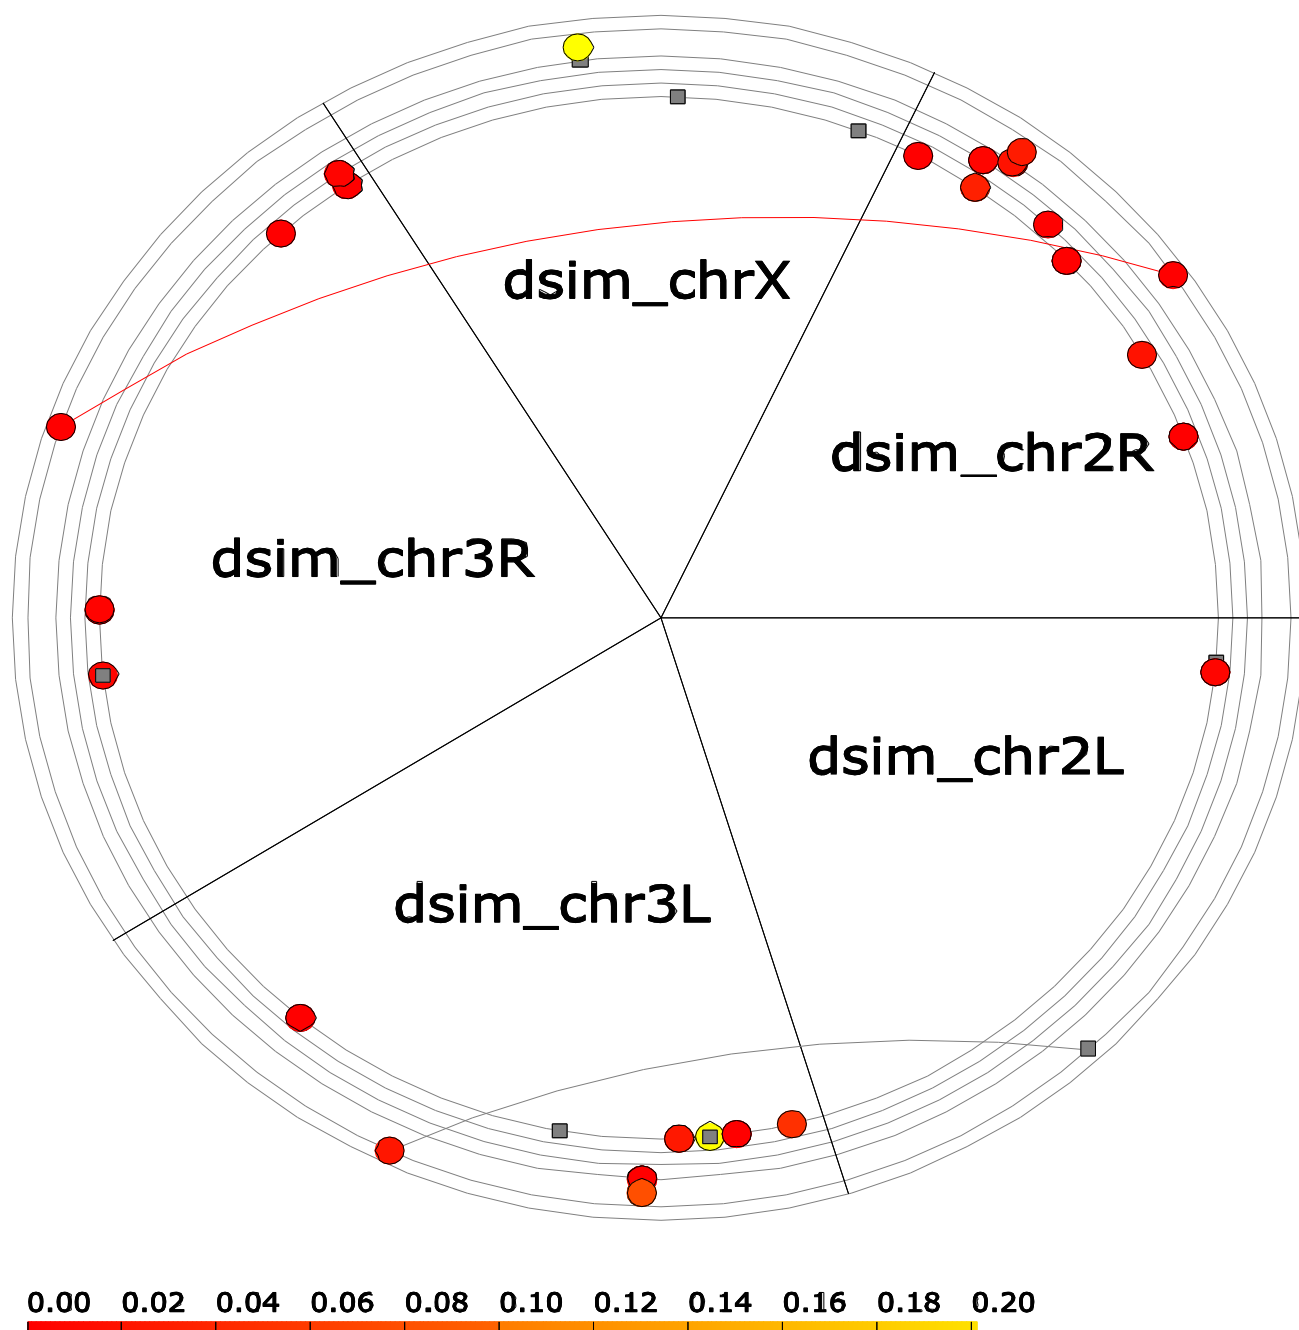

Figure S13: Shown here are lineage-specific duplications in *D. simulans* for the five large chromosomal arms. See legend of Figure S12 for an explanation of the plot layout.

## Proteins with sites predicted to by subject to positive selection:

| <i>Transcript</i> | <i>N</i> | <i>P-Value</i> | <i>Sites</i>                  | <i>Interpro</i>                                 | <i>PFAM</i>                                            |
|-------------------|----------|----------------|-------------------------------|-------------------------------------------------|--------------------------------------------------------|
| CG11538-RA        | 43       | 1.37E-71       | G638,H659,P636,G640,I433      |                                                 |                                                        |
| CG7052-RB         | 26       | 2.80E-23       | E637,G638,P647,Y649,W643      | IPR000215 Proteinase inhibitor I4, serpin       | PF00207 Alpha-2-macroglobulin family                   |
|                   |          |                |                               | IPR001599 Alpha-2-macroglobulin                 | PF01835 Alpha-2-macroglobulin family N-terminal region |
|                   |          |                |                               | IPR002890 Alpha-2-macroglobulin, N-terminal     | PF07677 A-macroglobulin receptor                       |
|                   |          |                |                               | IPR011625 Alpha-2-macroglobulin, N-terminal 2   | PF07678 A-macroglobulin complement component           |
|                   |          |                |                               | IPR011626 A-macroglobulin complement component  | PF07703 Alpha-2-macroglobulin family N-terminal region |
|                   |          |                |                               | IPR011627 A-macroglobulin receptor              |                                                        |
| CG17054-RA        | 22       | 5.13E-21       | L1133,L1143,K1139,M1118,D1119 |                                                 |                                                        |
| CG32092-RB        | 18       | 3.56E-10       | H1858,E24,Q227,A1798,Y1856    | IPR000859 CUB                                   | PF00431 CUB domain                                     |
| CG10363-RA        | 14       | 1.72E-09       | H672,D670,A678,T375,F674      | IPR001599 Alpha-2-macroglobulin                 | PF00207 Alpha-2-macroglobulin family                   |
|                   |          |                |                               | IPR002890 Alpha-2-macroglobulin, N-terminal     | PF01835 Alpha-2-macroglobulin family N-terminal region |
|                   |          |                |                               | IPR011625 Alpha-2-macroglobulin, N-terminal 2   | PF07677 A-macroglobulin receptor                       |
|                   |          |                |                               | IPR011626 A-macroglobulin complement component  | PF07678 A-macroglobulin complement component           |
|                   |          |                |                               | IPR011627 A-macroglobulin receptor              | PF07703 Alpha-2-macroglobulin family N-terminal region |
| CG6947-RA         | 14       | 4.61E-12       | L693,H434,R989,T1074,L859     | IPR001687 ATP/GTP-binding site motif A (P-loop) | PF01607 Chitin binding Peritrophin-A domain            |
|                   |          |                |                               | IPR002557 Chitin binding Peritrophin-A          |                                                        |
| CG2233-RA         | 13       | 3.06E-16       | I81,Y74,N79,R51,E26           |                                                 |                                                        |
| CG7298-RA         | 13       | 6.55E-17       | L136,A195,V127,S194,S76       | IPR002557 Chitin binding Peritrophin-A          | PF01607 Chitin binding Peritrophin-A domain            |
| CG11321-RA        | 11       | 1.51E-05       | G1941,S2390,Q2386,V2388,P1574 | IPR001841 Zinc finger, RING-type                | PF01485 IBR domain                                     |

|            |    |          |                                |           |                                                     |         |                                                            |
|------------|----|----------|--------------------------------|-----------|-----------------------------------------------------|---------|------------------------------------------------------------|
| CG11856-RA | 11 | 1.20E-05 | T1818,A2359,G1275,L2<br>021,T3 | IPR002867 | Zinc finger, C6HC-type                              |         |                                                            |
|            |    |          |                                | IPR000156 | RanBP1                                              | PF00638 | RanBP1 domain                                              |
|            |    |          |                                | IPR000694 | Proline-rich region                                 | PF00641 | Zn-finger in Ran binding protein                           |
|            |    |          |                                | IPR000697 | EVH1                                                |         | and others                                                 |
|            |    |          |                                | IPR001687 | ATP/GTP-binding site motif<br>A (P-loop)            |         |                                                            |
|            |    |          |                                | IPR001876 | Zinc finger, RanBP2-type                            |         |                                                            |
| CG8201-RA  | 11 | 6.55E-13 | A185,S182,G179,S186,<br>T180   | IPR013026 | Tetratricopeptide region                            |         |                                                            |
|            |    |          |                                | IPR000104 | Antifreeze protein, type I                          | PF00069 | Protein kinase domain                                      |
|            |    |          |                                | IPR000449 | Ubiquitin-associated                                | PF00627 | UBA/TS-N domain                                            |
|            |    |          |                                | IPR000719 | Protein kinase                                      | PF02149 | Kinase associated domain 1                                 |
|            |    |          |                                | IPR001245 | Tyrosine protein kinase                             | PF07714 | Protein tyrosine kinase                                    |
|            |    |          |                                | IPR001772 | Kinase-associated, C-terminal                       |         |                                                            |
| CG17838-RA | 10 | 1.58E-12 | K489,I497,N484,S494,G<br>495   | IPR008271 | Serine/threonine protein<br>kinase, active site     |         |                                                            |
|            |    |          |                                | IPR000504 | RNA-binding region RNP-1<br>(RNA recognition motif) | PF00076 | RNA recognition motif. (a.k.a.<br>RRM, RBD, or RNP domain) |
|            |    |          |                                | IPR001472 | Bipartite nuclear localization<br>signal            |         |                                                            |
| CG3158-RA  | 10 | 3.92E-06 | K1038,A854,P616,S39,P<br>706   | IPR001410 | DEAD/DEAH box helicase                              | PF00270 | DEAD/DEAH box helicase                                     |
|            |    |          |                                | IPR001650 | Helicase, C-terminal                                | PF00271 | Helicase conserved C-terminal<br>domain                    |
|            |    |          |                                | IPR001687 | ATP/GTP-binding site motif<br>A (P-loop)            | PF00567 | Tudor domain                                               |
|            |    |          |                                | IPR002999 | Tudor                                               | PF04408 | Helicase associated domain (HA2)                           |
|            |    |          |                                | IPR007087 | Zinc finger, C2H2-type                              |         |                                                            |
|            |    |          |                                | IPR007502 | Helicase-associated region                          |         |                                                            |
|            |    |          |                                | IPR008191 | Maternal tudor protein                              |         |                                                            |
|            |    |          |                                | IPR011545 | DEAD/DEAH box helicase,<br>N-terminal               |         |                                                            |
| CG11098-RA | 9  | 2.13E-07 | V306,F753,Q372,A701,<br>P436   | IPR000694 | Proline-rich region                                 |         |                                                            |
|            |    |          |                                | IPR001472 | Bipartite nuclear localization<br>signal            |         |                                                            |
| CG6483-RA  | 9  | 1.42E-11 | Q194,S234,L142,T268,T          | IPR001254 | Peptidase S1 and S6,                                | PF00089 | Trypsin                                                    |

|            |   |          |                                 |                                                                                                                                              |                                                                                            |                                                                                   |
|------------|---|----------|---------------------------------|----------------------------------------------------------------------------------------------------------------------------------------------|--------------------------------------------------------------------------------------------|-----------------------------------------------------------------------------------|
|            |   |          |                                 | chymotrypsin/Hap<br>Peptidase S1A,<br>chymotrypsin<br>ATP/GTP-binding site motif<br>A (P-loop)<br>Peptidase S1B, glutamyl<br>endopeptidase I |                                                                                            |                                                                                   |
|            |   |          | IPR001314                       |                                                                                                                                              |                                                                                            |                                                                                   |
|            |   |          | IPR001687                       |                                                                                                                                              |                                                                                            |                                                                                   |
|            |   |          | IPR008256                       |                                                                                                                                              |                                                                                            |                                                                                   |
| CG6493-RA  | 9 | 1.05E-04 | W433,L261,G603,T489,<br>Y510    | IPR000999                                                                                                                                    | Ribonuclease III<br>Double-stranded RNA<br>binding                                         | PF00035 Double-stranded RNA binding<br>motif                                      |
|            |   |          | IPR001159                       |                                                                                                                                              |                                                                                            | PF00270 DEAD/DEAH box helicase<br>Helicase conserved C-terminal<br>domain         |
|            |   |          | IPR001410                       |                                                                                                                                              | DEAD/DEAH box helicase                                                                     | PF00271                                                                           |
|            |   |          | IPR001650                       |                                                                                                                                              | Helicase, C-terminal<br>Argonaute and Dicer<br>protein, PAZ                                | PF00636 RNase3 domain                                                             |
|            |   |          | IPR003100                       |                                                                                                                                              | Protein of unknown function<br>DUF283                                                      | PF02170 PAZ domain                                                                |
|            |   |          | IPR005034                       |                                                                                                                                              | Type III restriction enzyme,<br>res subunit                                                | PF03368 Domain of unknown function<br>Type III restriction enzyme, res<br>subunit |
|            |   |          | IPR006935                       |                                                                                                                                              | DEAD/DEAH box helicase,<br>N-terminal                                                      | PF04851                                                                           |
|            |   |          | IPR011545                       |                                                                                                                                              |                                                                                            |                                                                                   |
| CG9125-RA  | 9 | 4.40E-10 | L346,S104,P257,T210,K<br>229    |                                                                                                                                              |                                                                                            |                                                                                   |
| CG14303-RA | 8 | 1.69E-04 | S480,D461,P1251,P117<br>9,C1585 | IPR002999                                                                                                                                    | Tudor                                                                                      | PF00567 Tudor domain                                                              |
|            |   |          |                                 | IPR008191                                                                                                                                    | Maternal tudor protein                                                                     |                                                                                   |
| CG15287-RA | 8 | 1.36E-04 | P1075,R1080,S889,H10<br>77,P611 | IPR001472                                                                                                                                    | Bipartite nuclear localization<br>signal                                                   |                                                                                   |
|            |   |          |                                 | IPR001687                                                                                                                                    | ATP/GTP-binding site motif<br>A (P-loop)                                                   |                                                                                   |
| CG2941-RA  | 8 | 4.95E-06 | S159,D798,D67,A675,K<br>545     |                                                                                                                                              |                                                                                            |                                                                                   |
| CG11328-RB | 7 | 8.49E-06 | V370,R369,G170,P167,<br>K366    | IPR001463                                                                                                                                    | Sodium:alanine symporter<br>Na <sup>+</sup> /H <sup>+</sup> exchanger, isoform<br>6 (NHE6) | PF00999 Sodium/hydrogen exchanger<br>family                                       |
|            |   |          |                                 | IPR002090                                                                                                                                    | Sodium/hydrogen exchanger<br>subfamily                                                     |                                                                                   |
|            |   |          |                                 | IPR004709                                                                                                                                    |                                                                                            |                                                                                   |
| CG13742-RA | 7 | 5.52E-06 | G576,G441,E105,M28,             | IPR006153                                                                                                                                    | Sodium/hydrogen exchanger                                                                  |                                                                                   |

|            |   |          |                                                |           |                                                     |         |                                                            |
|------------|---|----------|------------------------------------------------|-----------|-----------------------------------------------------|---------|------------------------------------------------------------|
| CG14168-RA | 7 | 3.18E-06 | V291<br>L193,N197,P185,V500,<br>N496           | IPR001478 | PDZ/DHR/GLGF                                        | PF00595 | PDZ domain (Also known as DHR<br>or GLGF)                  |
| CG2791-RA  | 7 | 3.88E-06 | G218,A220,S459,G366,<br>E355                   |           |                                                     |         |                                                            |
| CG32469-RA | 7 | 4.57E-11 | S56,Y39,G37,S51,A112<br>G1047,R526,P481,S104   |           |                                                     |         |                                                            |
| CG9809-RA  | 7 | 2.48E-05 | 8,S408                                         | IPR000504 | RNA-binding region RNP-1<br>(RNA recognition motif) | PF00076 | RNA recognition motif. (a.k.a.<br>RRM, RBD, or RNP domain) |
|            |   |          |                                                | IPR001472 | Bipartite nuclear localization<br>signal            |         |                                                            |
|            |   |          |                                                | IPR001687 | ATP/GTP-binding site motif<br>A (P-loop)            |         |                                                            |
| CG14247-RA | 6 | 1.43E-08 | T112,N135,I115,G26,N6<br>S432,A586,I242,P285,S |           |                                                     |         |                                                            |
| CG14685-RA | 6 | 6.79E-05 | 459                                            |           |                                                     |         |                                                            |
| CG15214-RA | 6 | 1.38E-07 | G121,S120,W122,G270,<br>L271                   | IPR001687 | ATP/GTP-binding site motif<br>A (P-loop)            | PF00047 | Immunoglobulin domain                                      |
|            |   |          |                                                | IPR013098 | Immunoglobulin I-set                                | PF07679 | Immunoglobulin I-set domain                                |
|            |   |          |                                                | IPR013106 | Immunoglobulin V-set                                | PF07686 | Immunoglobulin V-set domain                                |
|            |   |          |                                                | IPR013151 | Immunoglobulin                                      |         |                                                            |
| CG17930-RA | 6 | 2.69E-06 | S91,A92,N93,Y262,Y45<br>6                      | IPR000694 | Proline-rich region                                 | PF00083 | Sugar (and other) transporter                              |
|            |   |          |                                                | IPR005828 | General substrate transporter<br>Sugar transporter  |         |                                                            |
|            |   |          |                                                | IPR005829 | superfamily                                         |         |                                                            |
| CG30502-RA | 6 | 8.87E-07 | N14,P81,T186,G48,G26<br>7                      | IPR001199 | Cytochrome b5                                       | PF00173 | Cytochrome b5-like Heme/Steroid<br>binding domain          |
| CG3568-RA  | 6 | 1.44E-05 | T302,D87,S308,S368,T3<br>01                    |           |                                                     |         |                                                            |
| CG4616-RB  | 6 | 5.14E-06 | T675,H776,P190,V375,<br>A786                   | IPR001472 | Bipartite nuclear localization<br>signal            |         |                                                            |
| CG5630-RA  | 6 | 9.78E-06 | A303,I238,V306,S314,I<br>200                   |           |                                                     |         |                                                            |
| CG8523-RA  | 6 | 2.87E-03 | L978,Q754,A720,S109,<br>L96                    | IPR001140 | ABC transporter,<br>transmembrane region            | PF00005 | ABC transporter                                            |
|            |   |          |                                                | IPR001687 | ATP/GTP-binding site motif<br>A (P-loop)            | PF00664 | ABC transporter transmembrane<br>region                    |
|            |   |          |                                                | IPR003439 | ABC transporter related                             |         |                                                            |
| CG8590-RA  | 6 | 7.47E-04 | S1185,I609,V1187,V489<br>,Q1127                | IPR001472 | Bipartite nuclear localization<br>signal            | PF00225 | Kinesin motor domain                                       |

|            |   |          |                          |                                          |                                                                                                    |                                                     |
|------------|---|----------|--------------------------|------------------------------------------|----------------------------------------------------------------------------------------------------|-----------------------------------------------------|
|            |   |          | IPR001687                | ATP/GTP-binding site motif<br>A (P-loop) |                                                                                                    |                                                     |
|            |   |          | IPR001752                | Kinesin, motor region                    |                                                                                                    |                                                     |
| CG9508-RA  | 6 | 2.29E-04 | W294,S291,R477,S875,I504 | IPR000718                                | Peptidase M13, neprilysin<br>Peptidase M, neutral zinc<br>metallopeptidases, zinc-<br>binding site | PF00047 Immunoglobulin domain                       |
|            |   |          | IPR006025                |                                          | PF01431                                                                                            | Peptidase family M13                                |
|            |   |          | IPR013098                | Immunoglobulin I-set                     | PF07679                                                                                            | Immunoglobulin I-set domain                         |
|            |   |          | IPR013106                | Immunoglobulin V-set                     | PF07686                                                                                            | Immunoglobulin V-set domain                         |
|            |   |          | IPR013151                | Immunoglobulin                           |                                                                                                    |                                                     |
| CG10095-RA | 5 | 1.28E-04 | L441,A25,T442,T608,K610  | IPR000104                                | Antifreeze protein, type I                                                                         | PF07686 Immunoglobulin V-set domain                 |
|            |   |          |                          | IPR013106                                | Immunoglobulin V-set                                                                               |                                                     |
| CG10586-RA | 5 | 1.22E-05 | G147,P38,A269,I193,S153  | IPR001254                                | Peptidase S1 and S6,<br>chymotrypsin/Hap                                                           | PF00089 Trypsin                                     |
|            |   |          |                          | IPR001314                                | Peptidase S1A,<br>chymotrypsin                                                                     |                                                     |
| CG1082-RA  | 5 | 4.61E-05 | A179,A113,L454,W350,S76  | IPR000379                                | Esterase/lipase/thioesterase                                                                       | PF00135 Carboxylesterase                            |
|            |   |          |                          | IPR002018                                | Carboxylesterase, type B                                                                           |                                                     |
| CG12437-RB | 5 | 1.84E-03 | A282,A69,G490,S729,A64   | IPR001687                                | ATP/GTP-binding site motif<br>A (P-loop)                                                           |                                                     |
| CG12713-RA | 5 | 2.17E-05 | K26,S70,D125,F67,G234    |                                          |                                                                                                    |                                                     |
| CG12885-RA | 5 | 1.26E-04 | P328,P332,A331,G334,T621 |                                          |                                                                                                    |                                                     |
| CG13190-RA | 5 | 5.16E-05 | N207,S58,P220,L21,N187   |                                          |                                                                                                    |                                                     |
| CG13400-RA | 5 | 1.48E-03 | K206,I380,K387,I685,G386 | IPR005033                                | YEATS                                                                                              | PF03366 YEATS family                                |
| CG13594-RA | 5 | 1.47E-05 | G171,P464,V410,A70,G166  | IPR000104                                | Antifreeze protein, type I                                                                         |                                                     |
|            |   |          |                          | IPR001472                                | Bipartite nuclear localization<br>signal                                                           |                                                     |
|            |   |          |                          | IPR004051                                | Kv1.4 voltage-gated K+<br>channel                                                                  |                                                     |
| CG13793-RA | 5 | 3.64E-05 | W79,L108,A77,T75,N109    | IPR000175                                | Sodium:neurotransmitter<br>symporter                                                               | PF00209 Sodium:neurotransmitter<br>symporter family |
| CG14499-RA | 5 | 2.82E-07 | S16,K39,Q15,L19,Q47      |                                          |                                                                                                    |                                                     |

|            |   |          |                                 |           |                                                                           |         |                                                                             |
|------------|---|----------|---------------------------------|-----------|---------------------------------------------------------------------------|---------|-----------------------------------------------------------------------------|
| CG15427-RD | 5 | 2.02E-03 | A898,Q100,R900,T902,<br>E505    | IPR003961 | Fibronectin, type III<br>Fibronectin, type III<br>subdomain               | PF00041 | Fibronectin type III domain                                                 |
|            |   |          |                                 | IPR003962 | Immunoglobulin I-set                                                      | PF00047 | Immunoglobulin domain                                                       |
|            |   |          |                                 | IPR013098 | Immunoglobulin I-set                                                      | PF07679 | Immunoglobulin I-set domain                                                 |
|            |   |          |                                 | IPR013106 | Immunoglobulin V-set                                                      | PF07686 | Immunoglobulin V-set domain                                                 |
|            |   |          |                                 | IPR013151 | Immunoglobulin<br>Bipartite nuclear localization<br>signal                |         |                                                                             |
| CG18596-RA | 5 | 7.44E-03 | T640,V820,S46,E675,E<br>853     | IPR001472 | tRNA/rRNA<br>methyltransferase, SpoU                                      | PF00588 | SpoU rRNA Methylase family                                                  |
|            |   |          |                                 | IPR001537 |                                                                           |         |                                                                             |
| CG2221-RA  | 5 | 2.60E-04 | M149,Q148,D142,H541,<br>F268    | IPR002165 | Plexin<br>Peptidase C19, ubiquitin<br>carboxyl-terminal hydrolase<br>2    | PF01437 | Plexin repeat                                                               |
| CG30421-RA | 5 | 3.97E-03 | K1042,A631,V1043,V9<br>72,G1025 | IPR001394 | Guanine nucleotide<br>exchange factor for Ras-like<br>GTPases, N-terminal | PF00443 | Ubiquitin carboxyl-terminal<br>hydrolase                                    |
| CG3126-RA  | 5 | 3.27E-03 | A1101,E805,S874,Q890,<br>S853   | IPR000651 | Proline-rich region<br>Bipartite nuclear localization<br>signal           | PF00617 | RasGEF domain<br>Guanine nucleotide exchange<br>factor for Ras-like GTPases |
|            |   |          |                                 | IPR000694 | Guanine-nucleotide<br>dissociation stimulator<br>CDC25                    | PF00618 | N-terminal motif                                                            |
|            |   |          |                                 | IPR001472 |                                                                           |         |                                                                             |
|            |   |          |                                 | IPR001895 |                                                                           |         |                                                                             |
|            |   |          |                                 | IPR006077 | Vinculin/alpha-catenin<br>Na+ channel, amiloride-<br>sensitive            |         | Amiloride-sensitive sodium<br>channel                                       |
| CG33349-RA | 5 | 1.37E-04 | T43,K259,S377,S250,F2<br>31     | IPR001873 | Peptidase S1 and S6,<br>chymotrypsin/Hap                                  | PF00858 |                                                                             |
| CG4613-RA  | 5 | 5.69E-05 | S156,S149,Q269,P152,P<br>49     | IPR001254 | Peptidase S1A,<br>chymotrypsin                                            | PF00089 | Trypsin                                                                     |
|            |   |          |                                 | IPR001314 |                                                                           |         |                                                                             |
| CG4898-RE  | 5 | 1.88E-07 | N307,H304,P308,T312,<br>N306    | IPR000533 | Tropomyosin<br>ATP/GTP-binding site motif                                 | PF00261 | Tropomyosin                                                                 |
| CG6204-RA  | 5 | 2.76E-03 | I831,G230,M428,M749,<br>T213    | IPR001687 | A (P-loop)<br>Peptidase S1 and S6,<br>chymotrypsin/Hap                    |         |                                                                             |
| CG6467-RA  | 5 | 5.97E-06 | T75,S143,K146,K216,S<br>231     | IPR001254 | Peptidase S1A,<br>chymotrypsin                                            | PF00089 | Trypsin                                                                     |
|            |   |          |                                 | IPR001314 |                                                                           |         |                                                                             |



|            |   |          |                          |           |                                                                   |         |                                               |
|------------|---|----------|--------------------------|-----------|-------------------------------------------------------------------|---------|-----------------------------------------------|
| CG6967-RA  | 5 | 8.49E-04 | L179,H181,N604,E44,P651  | IPR001687 | ATP/GTP-binding site motif A (P-loop)                             |         |                                               |
| CG7413-RA  | 5 | 2.67E-03 | T800,K808,E820,M572,E558 | IPR002719 | Retinoblastoma-associated protein, B-box                          | PF01857 | Retinoblastoma-associated protein B domain    |
|            |   |          |                          | IPR002720 | Retinoblastoma-associated protein, A-box                          | PF01858 | Retinoblastoma-associated protein A domain    |
| CG7795-RA  | 5 | 2.50E-04 | S77,V79,S312,N482,D163   |           |                                                                   |         |                                               |
| CG7869-RA  | 5 | 1.76E-03 | L513,S499,Y648,L461,S250 | IPR000330 | SNF2-related Bipartite nuclear localization signal                | PF00176 | SNF2 family N-terminal domain                 |
|            |   |          |                          | IPR001472 |                                                                   |         |                                               |
| CG9925-RA  | 5 | 1.64E-03 | I827,I856,K864,C53,R857  | IPR000694 | Proline-rich region                                               | PF00567 | Tudor domain                                  |
|            |   |          |                          | IPR002893 | Zinc finger, MYND-type                                            | PF01753 | MYND finger                                   |
|            |   |          |                          | IPR002999 | Tudor                                                             |         |                                               |
|            |   |          |                          | IPR008191 | Maternal tudor protein                                            |         |                                               |
| CG10101-RA | 4 | 5.04E-03 | R269,L263,P277,N265      | IPR001320 | Ionotropic glutamate receptor                                     | PF00060 | Ligand-gated ion channel                      |
| CG10700-RA | 4 | 3.13E-03 | E518,L534,E79,S122       | IPR000103 | Pyridine nucleotide-disulphide oxidoreductase, class-II           | PF00070 | Pyridine nucleotide-disulphide oxidoreductase |
|            |   |          |                          | IPR000759 | Adrenodoxin reductase                                             | PF00355 | Rieske [2Fe-2S] domain                        |
|            |   |          |                          | IPR001100 | Pyridine nucleotide-disulphide oxidoreductase, class I            | PF07992 | Pyridine nucleotide-disulphide oxidoreductase |
|            |   |          |                          | IPR001327 | Pyridine nucleotide-disulphide oxidoreductase, NAD-binding region |         |                                               |
|            |   |          |                          | IPR005806 | Rieske [2Fe-2S] region                                            |         |                                               |
|            |   |          |                          | IPR013027 | FAD-dependent pyridine nucleotide-disulphide oxidoreductase       |         |                                               |
| CG10901-RA | 4 | 1.47E-03 | S20,R139,P138,L375       |           |                                                                   |         |                                               |
| CG11912-RA | 4 | 1.36E-04 | N195,S225,T151,S168      | IPR001254 | Peptidase S1 and S6, chymotrypsin/Hap                             | PF00089 | Trypsin                                       |
|            |   |          |                          | IPR001314 | Peptidase S1A, chymotrypsin                                       |         |                                               |
|            |   |          |                          | IPR008256 | Peptidase S1B, glutamyl endopeptidase I                           |         |                                               |
| CG11983-RA | 4 | 9.55E-04 | S417,I134,V126,V111      |           |                                                                   |         |                                               |

|            |   |          |                     |           |                                          |         |                                                   |
|------------|---|----------|---------------------|-----------|------------------------------------------|---------|---------------------------------------------------|
| CG12096-RA | 4 | 1.91E-03 | Y259,L205,P165,L155 | IPR001472 | Bipartite nuclear localization signal    |         |                                                   |
| CG12945-RA | 4 | 9.21E-05 | K208,P207,P233,D216 | IPR001472 | Bipartite nuclear localization signal    |         |                                                   |
| CG12951-RA | 4 | 1.78E-04 | T80,D79,L11,D108    | IPR001254 | Peptidase S1 and S6, chymotrypsin/Hap    | PF00089 | Trypsin                                           |
|            |   |          |                     | IPR001314 | Peptidase S1A, chymotrypsin              |         |                                                   |
|            |   |          |                     | IPR001316 | Peptidase S1E, alpha-lytic endopeptidase |         |                                                   |
| CG13075-RA | 4 | 5.35E-05 | L70,A115,I134,Q29   |           |                                          |         |                                                   |
| CG13329-RA | 4 | 6.24E-05 | D73,R72,Y87,G222    | IPR000164 | Histone H3                               | PF00125 | Core histone H2A/H2B/H3/H4                        |
|            |   |          |                     | IPR001472 | Bipartite nuclear localization signal    |         |                                                   |
|            |   |          |                     | IPR002185 | Dopamine D4 receptor                     |         |                                                   |
|            |   |          |                     | IPR007124 | Histone-fold/TFIID-TAF/NF-Y              |         |                                                   |
|            |   |          |                     | IPR007125 | Histone core                             |         |                                                   |
| CG13353-RA | 4 | 1.13E-04 | R77,A76,W48,G94     |           |                                          |         |                                                   |
| CG14355-RA | 4 | 5.47E-03 | S56,A242,T438,T136  |           |                                          |         |                                                   |
| CG14369-RA | 4 | 8.78E-07 | N44,G61,L46,L45     |           |                                          |         |                                                   |
| CG14893-RA | 4 | 2.17E-03 | T326,L154,N337,A82  | IPR004262 | Male sterility                           | PF03015 | Male sterility protein                            |
|            |   |          |                     | IPR013120 | Male sterility C-terminal                | PF07993 | Male sterility protein                            |
| CG15098-RA | 4 | 2.14E-05 | Q121,V67,D138,N125  |           |                                          |         |                                                   |
| CG15279-RC | 4 | 6.37E-03 | L11,S558,N403,D36   | IPR000175 | Sodium:neurotransmitter symporter        | PF00209 | Sodium:neurotransmitter symporter family          |
| CG15415-RA | 4 | 7.10E-03 | P488,T312,A164,V508 | IPR001472 | Bipartite nuclear localization signal    |         |                                                   |
| CG15707-RA | 4 | 4.64E-04 | E327,G559,P625,F552 | IPR000571 | Zinc finger, CCCH-type                   | PF00567 | Tudor domain                                      |
|            |   |          |                     | IPR002999 | Tudor                                    | PF00642 | Zinc finger C-x8-C-x5-C-x3-H type (and similar)   |
|            |   |          |                     | IPR008191 | Maternal tudor protein                   |         |                                                   |
| CG16801-RB | 4 | 1.46E-03 | P119,S118,R112,L121 | IPR000324 | Vitamin D receptor                       | PF00104 | Ligand-binding domain of nuclear hormone receptor |
|            |   |          |                     | IPR000536 | Nuclear hormone receptor, ligand-binding | PF00105 | Zinc finger, C4 type (two domains)                |
|            |   |          |                     | IPR000694 | Proline-rich region                      |         |                                                   |
|            |   |          |                     | IPR001628 | Nuclear hormone receptor, DNA-binding    |         |                                                   |

|            |   |          |                     |                                                                                       |         |                                                                 |
|------------|---|----------|---------------------|---------------------------------------------------------------------------------------|---------|-----------------------------------------------------------------|
|            |   |          | IPR001723           | Steroid hormone receptor                                                              |         |                                                                 |
| CG16965-RA | 4 | 8.16E-03 | D223,S660,H656,Q644 | Glycoside hydrolase family 65, central catalytic                                      | PF03632 | Glycosyl hydrolase family 65 central catalytic domain           |
| CG18389-RA | 4 | 9.74E-03 | A350,S353,N519,I37  | Bipartite nuclear localization signal                                                 | PF05225 | helix-turn-helix, Psq domain                                    |
| CG18550-RA | 4 | 1.36E-03 | S68,S69,G209,S67    | Helix-turn-helix, Psq                                                                 |         |                                                                 |
|            |   |          | IPR003534           | Major royal jelly protein                                                             | PF03022 | Major royal jelly protein                                       |
|            |   |          |                     | Eubacterial/plasma membrane H <sup>+</sup> -transporting two-sector ATPase, C subunit |         |                                                                 |
| CG1863-RB  | 4 | 6.66E-03 | L104,R437,S677,V62  | Zinc finger, RING-type                                                                | PF03145 | Seven in absentia protein family                                |
| CG2681-RA  | 4 | 2.15E-03 | M69,K77,I161,T78    | Seven in absentia protein                                                             |         |                                                                 |
| CG3024-RA  | 4 | 3.88E-04 | R293,N158,L290,N151 | Chaperonin clpA/B                                                                     | PF06309 | Torsin                                                          |
|            |   |          | IPR010448           | Torsin                                                                                |         |                                                                 |
| CG31301-RA | 4 | 1.23E-03 | C276,A176,T396,P198 | D111/G-patch                                                                          | PF00035 | Double-stranded RNA binding motif                               |
|            |   |          | IPR001159           | Double-stranded RNA binding                                                           | PF01424 | R3H domain                                                      |
|            |   |          | IPR001374           | Single-stranded nucleic acid binding R3H                                              | PF01585 | G-patch domain                                                  |
| CG31322-RA | 4 | 4.06E-03 | T199,S551,S522,R194 | Aminoacyl-tRNA synthetase, class Ia                                                   | PF00133 | tRNA synthetases class I (I, L, M and V)                        |
|            |   |          | IPR002300           | Methionyl-tRNA synthetase, class Ia                                                   |         |                                                                 |
| CG31453-RA | 4 | 1.33E-03 | H63,A36,L21,A56     | Disease resistance protein                                                            | PF00004 | ATPase family associated with various cellular activities (AAA) |
|            |   |          | IPR001270           | Chaperonin clpA/B                                                                     |         |                                                                 |
|            |   |          | IPR001687           | ATP/GTP-binding site motif A (P-loop)                                                 |         |                                                                 |
|            |   |          | IPR003959           | AAA ATPase, central region                                                            |         |                                                                 |
| CG31519-RA | 4 | 7.77E-04 | R110,A103,R220,S104 | Olfactory receptor, Drosophila                                                        | PF02949 | 7tm Odorant receptor                                            |
| CG31753-RA | 4 | 7.06E-03 | T691,R789,G742,T759 | Kv1.4 voltage-gated K <sup>+</sup> channel                                            | PF00096 | Zinc finger, C2H2 type                                          |
|            |   |          | IPR007086           | Zinc finger, C2H2-subtype                                                             |         |                                                                 |
|            |   |          | IPR007087           | Zinc finger, C2H2-type                                                                |         |                                                                 |
| CG31928-RA | 4 | 7.60E-04 | H22,V71,T188,D189   | Peptidase A1, pepsin                                                                  | PF00026 | Eukaryotic aspartyl protease                                    |
| CG32221-RA | 4 | 1.48E-03 | N166,Y167,C316,A393 | Cyclin-like F-box                                                                     | PF00646 | F-box domain                                                    |

|            |   |          |                     |           |                                                                         |         |                                                           |
|------------|---|----------|---------------------|-----------|-------------------------------------------------------------------------|---------|-----------------------------------------------------------|
| CG32364-RA | 4 | 6.80E-05 | T19,C107,E113,E186  | IPR000504 | RNA-binding region RNP-1<br>(RNA recognition motif)                     |         |                                                           |
| CG32438-RD | 4 | 8.33E-03 | S731,M697,A287,I713 | IPR000533 | Tropomyosin                                                             | PF02463 | RecF/RecN/SMC N terminal<br>domain                        |
|            |   |          |                     | IPR001687 | ATP/GTP-binding site motif<br>A (P-loop)                                |         |                                                           |
| CG33261-RA | 4 | 7.44E-04 | G451,G447,V445,S446 | IPR003395 | SMC protein, N-terminal                                                 |         |                                                           |
|            |   |          |                     | IPR000210 | BTB                                                                     | PF00651 | BTB/POZ domain                                            |
|            |   |          |                     | IPR000354 | Involucrin repeat                                                       | PF00904 | Involucrin repeat                                         |
|            |   |          |                     | IPR007087 | Zinc finger, C2H2-type                                                  |         |                                                           |
|            |   |          |                     | IPR013069 | BTB/POZ                                                                 |         |                                                           |
| CG3829-RA  | 4 | 3.66E-03 | T239,A236,N251,W240 | IPR002159 | CD36 antigen                                                            | PF01130 | CD36 family                                               |
| CG4435-RA  | 4 | 1.50E-03 | N97,K164,R318,S170  | IPR001503 | Glycosyl transferase, family<br>10                                      | PF00852 | Glycosyltransferase family 10<br>(fucosyltransferase)     |
| CG5250-RA  | 4 | 3.13E-04 | Y79,I142,I112,N110  | IPR000402 | Na+/K+ ATPase, beta<br>subunit                                          | PF00287 | Sodium / potassium ATPase beta<br>chain                   |
|            |   |          |                     |           | Bipartite nuclear localization<br>signal                                |         |                                                           |
| CG6176-RA  | 4 | 5.13E-03 | G98,K581,S238,N140  | IPR001472 |                                                                         |         |                                                           |
|            |   |          |                     | IPR001719 | AP endonuclease, family 2                                               | PF04130 | Spc97 / Spc98 family                                      |
|            |   |          |                     | IPR007259 | Spc97/Spc98                                                             |         |                                                           |
| CG7643-RA  | 4 | 3.45E-03 | E320,P318,V153,P322 | IPR000719 | Protein kinase                                                          | PF00069 | Protein kinase domain                                     |
|            |   |          |                     |           | ATP/GTP-binding site motif<br>A (P-loop)                                |         |                                                           |
|            |   |          |                     | IPR001687 | Serine/threonine protein<br>kinase, active site                         |         |                                                           |
|            |   |          |                     | IPR008271 |                                                                         |         |                                                           |
| CG8295-RD  | 4 | 1.20E-04 | K1,K3,K5,Q2         |           |                                                                         |         |                                                           |
| CG8589-RA  | 4 | 1.00E-03 | S385,F131,C91,P132  | IPR008191 | Maternal tudor protein                                                  | PF00567 | Tudor domain                                              |
| CG8712-RB  | 4 | 2.18E-04 | L219,T355,T110,P141 |           |                                                                         |         |                                                           |
| CG9109-RA  | 4 | 2.12E-03 | V191,S42,P184,E267  | IPR003378 | Fringe-like                                                             | PF02434 | Fringe-like                                               |
| CG9606-RA  | 4 | 7.77E-04 | R311,P71,S369,L297  | IPR001247 | Exoribonuclease                                                         | PF01138 | 3' exoribonuclease family, domain<br>1                    |
|            |   |          |                     | IPR001472 | Bipartite nuclear localization<br>signal                                |         |                                                           |
| CG9698-RA  | 4 | 2.32E-04 | G80,K82,L84,E81     | IPR005123 | 2OG-Fe(II) oxygenase                                                    | PF03171 | 2OG-Fe(II) oxygenase<br>superfamily                       |
|            |   |          |                     |           |                                                                         | PF08336 | Prolyl 4-Hydroxylase alpha-<br>subunit, N-terminal region |
| CG10090-RA | 3 | 1.66E-03 | A142,T168,S204      | IPR003397 | Mitochondrial import inner<br>membrane translocase,<br>subunit Tim17/22 | PF02466 | Tim17/Tim22/Tim23 family                                  |

|            |   |          |                |           |                                             |                    |                                                               |
|------------|---|----------|----------------|-----------|---------------------------------------------|--------------------|---------------------------------------------------------------|
| CG10938-RA | 3 | 2.95E-03 | R188,D194,L186 | IPR000426 | Proteasome alpha-subunit                    | PF00227            | Proteasome A-type and B-type                                  |
|            |   |          |                | IPR001353 | 20S proteasome, A and B subunits            |                    |                                                               |
| CG11347-RD | 3 | 1.43E-03 | E124,N169,L2   | IPR001472 | Bipartite nuclear localization signal       |                    |                                                               |
| CG11356-RA | 3 | 1.32E-03 | I50,S45,S96    | IPR001687 | ATP/GTP-binding site motif A (P-loop)       |                    |                                                               |
| CG11470-RA | 3 | 1.45E-03 | L118,P122,H86  | IPR001778 | Pollen allergen Poa pIX/Phl pVI, C-terminal | PF05267            | Protein of unknown function (DUF725)                          |
|            |   |          |                | IPR007931 | Protein of unknown function DUF725          |                    |                                                               |
| CG11723-RA | 3 | 3.53E-03 | T228,L233,L216 | IPR004210 | BESS motif                                  | PF02944            | BESS motif                                                    |
| CG11843-RA | 3 | 4.79E-03 | V26,V25,G27    | IPR001254 | Peptidase S1 and S6, chymotrypsin/Hap       | PF00089            | Trypsin                                                       |
|            |   |          |                | IPR001314 | Peptidase S1A, chymotrypsin                 |                    |                                                               |
| CG12108-RA | 3 | 4.69E-03 | K165,A186,E164 | IPR002472 | Palmitoyl protein thioesterase              | PF02089            | Palmitoyl protein thioesterase                                |
| CG13732-RA | 3 | 7.75E-04 | A119,E46,L103  |           |                                             |                    |                                                               |
| CG13788-RA | 3 | 5.50E-03 | Q159,T162,A157 |           |                                             | PF08395            | 7tm Chemosensory receptor                                     |
| CG14102-RA | 3 | 5.91E-03 | A204,P246,V279 |           |                                             |                    |                                                               |
| CG14151-RA | 3 | 7.32E-04 | T138,P141,A137 | IPR001472 | Bipartite nuclear localization signal       |                    |                                                               |
| CG14379-RA | 3 | 8.83E-04 | Y65,N69,T24    | IPR010512 | Protein of unknown function DUF1091         | PF06477            | Protein of unknown function (DUF1091)                         |
| CG14669-RA | 3 | 5.26E-04 | Q83,F85,T84    | IPR001230 | Prenyl group, CAAX box, attachment site     |                    |                                                               |
|            |   |          |                | IPR001806 | Ras GTPase                                  |                    |                                                               |
|            |   |          |                | IPR010916 | TonB box, N-terminal                        |                    |                                                               |
| CG14971-RA | 3 | 9.81E-03 | G292,Q110,T39  | IPR004853 | Protein of unknown function DUF250          | PF03151<br>PF08449 | Triose-phosphate Transporter family<br>UAA transporter family |
| CG15905-RA | 3 | 8.05E-04 | L159,T160,T140 |           |                                             |                    |                                                               |
| CG17610-RA | 3 | 1.54E-03 | S97,G99,D124   | IPR006209 | EGF-like                                    | PF00008            | EGF-like domain                                               |
|            |   |          |                | IPR013032 | EGF-like region                             |                    |                                                               |
| CG18094-RA | 3 | 8.15E-03 | R81,C343,R318  | IPR000086 | NUDIX hydrolase                             | PF00293            | NUDIX domain                                                  |
| CG18143-RA | 3 | 9.67E-03 | H364,F361,S216 | IPR002048 | Calcium-binding EF-hand                     | PF01979            | Amidohydrolase family                                         |
|            |   |          |                | IPR006680 | Amidohydrolase 1                            |                    |                                                               |
| CG1830-RB  | 3 | 4.60E-03 | G298,R300,R301 | IPR000719 | Protein kinase                              | PF00069            | Protein kinase domain                                         |

|            |   |          |                |                                               |                                                   |                                                                       |
|------------|---|----------|----------------|-----------------------------------------------|---------------------------------------------------|-----------------------------------------------------------------------|
|            |   |          | IPR001245      | Tyrosine protein kinase                       |                                                   |                                                                       |
|            |   |          | IPR001472      | Bipartite nuclear localization signal         |                                                   |                                                                       |
|            |   |          | IPR002291      | Phosphorylase kinase, gamma catalytic subunit |                                                   |                                                                       |
|            |   |          | IPR008271      | Serine/threonine protein kinase, active site  |                                                   |                                                                       |
| CG2050-RA  | 3 | 5.45E-03 | V537,A378,T180 | IPR000504                                     | RNA-binding region RNP-1 (RNA recognition motif)  | PF00076 RNA recognition motif. (a.k.a. RRM, RBD, or RNP domain)       |
|            |   |          |                | IPR001472                                     | Bipartite nuclear localization signal             |                                                                       |
|            |   |          |                | IPR001687                                     | ATP/GTP-binding site motif A (P-loop)             |                                                                       |
| CG30190-RA | 3 | 2.35E-03 | R194,L199,Y192 | IPR000694                                     | Proline-rich region                               |                                                                       |
| CG30327-RA | 3 | 5.65E-03 | P279,R25,F106  | IPR000504                                     | RNA-binding region RNP-1 (RNA recognition motif)  | PF00076 RNA recognition motif. (a.k.a. RRM, RBD, or RNP domain)       |
| CG31267-RA | 3 | 1.80E-03 | S74,W80,Q182   | IPR001230                                     | Prenyl group, CAAX box, attachment site           | PF00089 Trypsin                                                       |
|            |   |          |                | IPR001254                                     | Peptidase S1 and S6, chymotrypsin/Hap             |                                                                       |
|            |   |          |                | IPR001314                                     | Peptidase S1A, chymotrypsin                       |                                                                       |
| CG31605-RF | 3 | 7.61E-04 | V201,G204,A160 | IPR013098                                     | Immunoglobulin I-set                              | PF00047 Immunoglobulin domain                                         |
|            |   |          |                | IPR013106                                     | Immunoglobulin V-set                              | PF07679 Immunoglobulin I-set domain                                   |
|            |   |          |                | IPR013151                                     | Immunoglobulin                                    | PF07686 Immunoglobulin V-set domain                                   |
| CG3186-RA  | 3 | 8.36E-04 | T17,S107,L127  | IPR001884                                     | Eukaryotic initiation factor 5A hypusine (eIF-5A) | PF01287 Eukaryotic initiation factor 5A hypusine, DNA-binding OB fold |
| CG32510-RA | 3 | 1.83E-05 | S63,K58,I93    |                                               |                                                   |                                                                       |
| CG33005-RB | 3 | 3.02E-03 | L12,E244,S7    |                                               |                                                   |                                                                       |
| CG33479-RA | 3 | 4.74E-03 | E13,V47,N147   |                                               |                                                   |                                                                       |
| CG4413-RA  | 3 | 6.89E-03 | T256,V261,P252 | IPR007086                                     | Zinc finger, C2H2-subtype                         | PF00096 Zinc finger, C2H2 type                                        |
|            |   |          |                | IPR007087                                     | Zinc finger, C2H2-type                            | PF07776 Zinc-finger associated domain (zf-AD)                         |
|            |   |          |                | IPR012934                                     | Zinc finger, AD-type                              |                                                                       |
| CG4688-RA  | 3 | 2.12E-03 | S224,V226,I142 | IPR004045                                     | Glutathione S-transferase, N-terminal             | PF00043 Glutathione S-transferase, C-terminal domain                  |
|            |   |          |                | IPR004046                                     | Glutathione S-transferase, C-terminal             | PF02798 Glutathione S-transferase, N-terminal domain                  |
| CG5326-RA  | 3 | 3.81E-04 | A116,R117,V119 | IPR002076                                     | GNS1/SUR4 membrane protein                        | PF01151 GNS1/SUR4 family                                              |

|            |   |          |                |           |                                                          |                    |                                                          |
|------------|---|----------|----------------|-----------|----------------------------------------------------------|--------------------|----------------------------------------------------------|
| CG5783-RA  | 3 | 3.38E-03 | S148,G278,S250 | IPR000182 | GCN5-related N-acetyltransferase                         | PF00583<br>PF08445 | Acetyltransferase (GNAT) family<br>FR47-like protein     |
| CG6678-RA  | 3 | 8.86E-03 | A287,T354,A191 | IPR000408 | Regulator of chromosome condensation, RCC1               | PF00415            | Regulator of chromosome condensation (RCC1)              |
| CG7138-RA  | 3 | 4.17E-03 | K236,P28,S80   | IPR001159 | Double-stranded RNA binding                              | PF00035            | Double-stranded RNA binding motif                        |
| CG8667-RA  | 3 | 2.53E-03 | S118,S117,A116 | IPR001092 | Basic helix-loop-helix dimerisation region bHLH          | PF00010            | Helix-loop-helix DNA-binding domain                      |
| CG9631-RA  | 3 | 9.06E-03 | P144,S297,I76  | IPR001254 | Peptidase S1 and S6, chymotrypsin/Hap                    | PF00089            | Trypsin                                                  |
|            |   |          |                | IPR001314 | Peptidase S1A, chymotrypsin                              |                    |                                                          |
|            |   |          |                | IPR001687 | ATP/GTP-binding site motif A (P-loop)                    |                    |                                                          |
| CG11072-RA | 2 | 1.51E-03 | V36,T41        | IPR013069 | BTB/POZ                                                  | PF00651            | BTB/POZ domain                                           |
| CG11076-RA | 2 | 8.69E-03 | G168,E127      |           |                                                          |                    |                                                          |
| CG11769-RA | 2 | 7.22E-03 | E30,Q188       | IPR000104 | Antifreeze protein, type I                               |                    |                                                          |
| CG18779-RA | 2 | 3.77E-03 | Q82,N84        | IPR000618 | Insect cuticle protein                                   | PF00379            | Insect cuticle protein                                   |
|            |   |          |                | IPR001419 | HMW glutenin                                             |                    |                                                          |
| CG30441-RA | 2 | 7.87E-03 | T58,V63        |           |                                                          |                    |                                                          |
| CG31469-RA | 2 | 9.98E-03 | S99,T101       | IPR000106 | Low molecular weight phosphotyrosine protein phosphatase | PF01451            | Low molecular weight phosphotyrosine protein phosphatase |
|            |   |          |                | IPR002115 | Mammalian LMW phosphotyrosine protein phosphatase        |                    |                                                          |
| CG9415-RB  | 2 | 6.72E-03 | A176,N21       | IPR001472 | Bipartite nuclear localization signal                    | PF00170            | bZIP transcription factor                                |
|            |   |          |                | IPR004827 | Basic-leucine zipper (bZIP) transcription factor         | PF07716            | Basic region leucine zipper                              |
|            |   |          |                | IPR011616 | bZIP transcription factor, bZIP_1                        |                    |                                                          |
|            |   |          |                | IPR011700 | Basic leucine zipper                                     |                    |                                                          |
| CG9568-RA  | 2 | 5.76E-03 | E52,A108       |           |                                                          |                    |                                                          |

*Table S4: Transcript in D. melanogaster with positively selected sites. N gives the number of sites; only the first five residues with highest significance are shown. Interpro (Mulder et al. 2005) and PFAM annotations are shown (Finn et al. 2006).*

## Genes recently duplicated in *D. melanogaster* lineage

| Cluster | Distance to tips (min/max) |       | Genes | Identifiers                   | Locations                                                                   | Interpro                            | Description                                                                                               |
|---------|----------------------------|-------|-------|-------------------------------|-----------------------------------------------------------------------------|-------------------------------------|-----------------------------------------------------------------------------------------------------------|
| 7572    | 0.000                      | 0.000 | 2     | CG31953<br>CG8825             | chr2L:3162514:3163144<br>chr2L:3161912:3160148                              | IPR010347                           | Tyrosyl-DNA phosphodiesterase                                                                             |
| 4864    | 0.025                      | 0.026 | 2     | CG13041<br>CG13060            | chr3L:7487251:7487191<br>chr3L:16285256:16285196                            | IPR007614                           | Retinin-like protein                                                                                      |
| 1993    | 0.000                      | 0.000 | 2     | CG9650<br>CG9650              | chrX:7082960:7063124<br>chrX:7082351:7080140                                | IPR007087                           | Zinc finger, C2H2-type                                                                                    |
| 9025    | 0.036                      | 0.036 | 2     | CG4216<br>CG7271              | chr3L:5213027:5214311<br>chr3L:18554117:18555398                            | IPR007087                           | Zinc finger, C2H2-type                                                                                    |
| 6396    | 0.040                      | 0.087 | 2     | CG10146<br>CG18372            | chr2R:10262580:10262516<br>chr2R:10264435:10264371                          | IPR005520<br>IPR005521              | Attacin, N-terminal region<br>Attacin, C-terminal region                                                  |
| 6133    | 0.003                      | 0.012 | 2     | CG18859<br>CG32825            | chrX:2248569:2248002<br>chrX:19929638:19929071                              | IPR004117                           | Olfactory receptor, Drosophila                                                                            |
| 6891    | 0.000                      | 0.007 | 2     | CG18858<br>CG31683            | chr2L:1962839:1961744<br>chr2L:1971956:1970861                              | IPR003386                           | Lecithin:cholesterol acyltransferase                                                                      |
| 4303    | 0.022                      | 0.049 | 3     | CG32214<br>CG32208<br>CG32213 | chr3L:19432729:19432670<br>chr3L:4334532:4334473<br>chr3L:19441219:19441160 | IPR003072                           | Orphan nuclear receptor, NOR1 type                                                                        |
| 6833    | 0.000                      | 0.036 | 2     | CG14746<br>CG8577             | chr2R:4221575:4222130<br>chr2R:4225288:4225843                              | IPR002502                           | N-acetylmuramoyl-L-alanine amidase, family 2                                                              |
| 7327    | 0.036                      | 0.063 | 2     | CG1524<br>CG1527              | chrX:7779565:7779506<br>chrX:7780734:7780675                                | IPR001971                           | Ribosomal protein S11                                                                                     |
| 3729    | 0.026                      | 0.032 | 2     | CG17637<br>CG18281            | chr3L:20438026:20439538<br>chr3L:20433712:20435338                          | IPR001958<br>IPR011701              | Tetracycline resistance protein<br>Major facilitator superfamily MFS_1                                    |
| 8456    | 0.000                      | 0.000 | 2     | CG8974-RE<br>CG32581          | chrX:6596252:6595957<br>chrX:6592850:6592765                                | IPR001841                           | Zinc finger, RING-type                                                                                    |
| 7734    | 0.000                      | 0.075 | 2     | CG31352<br>CG31332-RD         | chr3R:22384108:22374387<br>chr3R:22391694:22387692                          | IPR001781<br>IPR003128              | LIM, zinc-binding<br>Villin headpiece                                                                     |
| 5742    | 0.032                      | 0.078 | 2     | CG31624<br>CG31988            | chr2L:1220304:1220838<br>chr2L:1217989:1218523                              | IPR001781                           | LIM, zinc-binding                                                                                         |
| 8910    | 0.034                      | 0.041 | 2     | CG17876<br>CG18730            | chr2R:12639662:12641144<br>chr2R:8131652:8133134                            | IPR001687<br>IPR006046<br>IPR006047 | ATP/GTP-binding site motif A (P-loop)<br>Glycoside hydrolase family 13<br>Alpha amylase, catalytic region |



| <i>Cluster</i> | <i>Distance to tips (min/max)</i> |       | <i>Genes</i> | <i>Identifiers</i> | <i>Locations</i>        | <i>Interpro</i> | <i>Description</i>                              |
|----------------|-----------------------------------|-------|--------------|--------------------|-------------------------|-----------------|-------------------------------------------------|
| 8653           | 0.003                             | 0.018 | 2            | CG31809            | chr2L:5558043:5557019   | IPR006048       | Alpha amylase, C-terminal all-beta              |
|                |                                   |       |              | CG31810            | chr2L:5562644:5559751   | IPR001687       | ATP/GTP-binding site motif A (P-loop)           |
|                |                                   |       |              |                    |                         | IPR002198       | Short-chain dehydrogenase/reductase SDR         |
|                |                                   |       |              |                    |                         | IPR002347       | Glucose/ribitol dehydrogenase                   |
| 4033           | 0.000                             | 0.000 | 2            | CG32495            | chrX:17739511:17734765  | IPR003560       | 2,3-dihydro-2,3-dihydroxybenzoate dehydrogenase |
|                |                                   |       |              | CG6835-RC          | chrX:17732089:17724086  | IPR001680       | WD-40 repeat                                    |
|                |                                   |       |              |                    |                         | IPR004887       | Eukaryotic glutathione synthase                 |
|                |                                   |       |              |                    |                         | IPR005615       | Eukaryotic glutathione synthase, ATP-binding    |
| 8825           | 0.000                             | 0.000 | 2            | CG4329             | chr2R:2647625:2646183   | IPR001680       | WD-40 repeat                                    |
| 9530           | 0.000                             | 0.000 | 2            | CG32640            | chrX:13012038:13012434  | IPR001623       | Heat shock protein DnaJ, N-terminal             |
|                |                                   |       |              | CG32641            | chrX:13018511:13018907  | IPR003095       | Heat shock protein DnaJ                         |
| 8865           | 0.048                             | 0.062 | 2            | CG4478             | chr2L:7529648:7529599   | IPR001472       | Bipartite nuclear localization signal           |
|                |                                   |       |              | CG4479             | chr2L:7532717:7532668   | IPR010477       | Protein of unknown function DUF1074             |
| 1549           | 0.085                             | 0.115 | 2            | CG33213            | chr3R:4160048:4161071   | IPR001472       | Bipartite nuclear localization signal           |
|                |                                   |       |              | CG33221            | chrX:18580258:18581569  | IPR007087       | Zinc finger, C2H2-type                          |
| 8654           | 0.096                             | 0.413 | 4            | CG18157            | chrX:8075041:8075632    | IPR001472       | Bipartite nuclear localization signal           |
|                |                                   |       |              | CG32601            | chrX:14212913:14213699  | IPR002715       | Nascent polypeptide-associated complex NAC      |
|                |                                   |       |              | CG32598            | chrX:8073474:8074260    |                 |                                                 |
|                |                                   |       |              | CG18313            | chrX:14214443:14215232  |                 |                                                 |
| 7699           | 0.004                             | 0.004 | 2            | CG31702            | chr2L:22060200:22060151 | IPR001472       | Bipartite nuclear localization signal           |
|                |                                   |       |              | CG31703            | chr2L:317319:317270     | IPR001687       | ATP/GTP-binding site motif A (P-loop)           |
| 2321           | 0.001                             | 0.026 | 4            | CG32823            | chrX:2199321:2196680    | IPR004343       | Plus-3                                          |
|                |                                   |       |              | CG18000            | chrX:2184595:2178159    | IPR001472       | Bipartite nuclear localization signal           |
|                |                                   |       |              | CG33499            | chrX:2192469:2188820    |                 |                                                 |
|                |                                   |       |              | CG33497            | chrX:2208028:2204379    | IPR001680       | WD-40 repeat                                    |
| 4631           | 0.017                             | 0.079 | 2            | CG12608            | chrX:7046951:7046721    | IPR001472       | Bipartite nuclear localization signal           |
|                |                                   |       |              | CG9123             | chrX:7049462:7049232    | IPR001680       | WD-40 repeat                                    |
| 5014           | 0.000                             | 0.012 | 2            | CG12819            | chr3R:6163229:6159035   | IPR001472       | Bipartite nuclear localization signal           |
|                |                                   |       |              | CG12592            | chr3R:6165832:6164137   |                 |                                                 |
| 8297           | 0.000                             | 0.018 | 5            | CG9579             | chrX:2219060:2217340    | IPR001464       | Annexin                                         |
|                |                                   |       |              | CG33491            | chrX:2211897:2211237    | IPR002388       | Annexin, type I                                 |

| <i>Cluster</i> | <i>Distance to tips (min/max)</i> |       | <i>Genes</i> | <i>Identifiers</i> | <i>Locations</i>        | <i>Interpro</i> | <i>Description</i>                                   |
|----------------|-----------------------------------|-------|--------------|--------------------|-------------------------|-----------------|------------------------------------------------------|
|                |                                   |       |              | CG33498            | chrX:2188474:2187818    | IPR002389       | Annexin, type II                                     |
|                |                                   |       |              | CG33496            | chrX:2204033:2203365    | IPR002390       | Annexin, type III                                    |
|                |                                   |       |              | CG33487            | chrX:2196334:2195678    | IPR002391       | Annexin, type IV                                     |
|                |                                   |       |              |                    |                         | IPR002392       | Annexin, type V                                      |
|                |                                   |       |              |                    |                         | IPR002393       | Annexin, type VI                                     |
| 6575           | 0.021                             | 0.025 | 2            | CG17556            | chr3R:15084272:15083406 | IPR001440       | Tetratricopeptide TPR_1                              |
|                |                                   |       |              | CG3678             | chr3R:15088493:15087598 | IPR013026       | Tetratricopeptide region                             |
| 8938           | 0.000                             | 0.005 | 2            | CG2947             | chrX:3636713:3635573    | IPR001440       | Tetratricopeptide TPR_1                              |
|                |                                   |       |              | CG32789            | chrX:3645796:3644656    | IPR001472       | Bipartite nuclear localization signal                |
|                |                                   |       |              |                    |                         | IPR013026       | Tetratricopeptide region                             |
|                |                                   |       |              |                    |                         | IPR013105       | Tetratricopeptide TPR_2                              |
| 10950          | 0.038                             | 0.057 | 2            | CG8821             | chr2R:12742491:12740554 | IPR001356       | Homeobox                                             |
|                |                                   |       |              | CG8819-RC          | chr2R:12738689:12736749 | IPR001472       | Bipartite nuclear localization signal                |
| 6325           | 0.019                             | 0.161 | 3            | CG17210            | chr3R:20838519:20838466 | IPR001283       | Allergen V5/Tpx-1 related                            |
|                |                                   |       |              | CG5106             | chr3R:7051424:7051371   | IPR003438       | Glial cell line-derived neurotrophic factor receptor |
|                |                                   |       |              | CG5207             | chr3R:7067102:7067037   |                 |                                                      |
| 5815           | 0.000                             | 0.029 | 2            | CG31034            | chr3R:2154744:2155539   | IPR001254       | Peptidase S1 and S6, chymotrypsin/Hap                |
|                |                                   |       |              | CG31362            | chr3R:25747963:25748758 | IPR001314       | Peptidase S1A, chymotrypsin                          |
|                |                                   |       |              |                    |                         | IPR008256       | Peptidase S1B, glutamyl endopeptidase I              |
| 3343           | 0.924                             | 0.993 | 2            | CG33461            | chr2R:11210925:11210475 | IPR001254       | Peptidase S1 and S6, chymotrypsin/Hap                |
|                |                                   |       |              | CG33462            | chr2R:11212304:11211915 | IPR001314       | Peptidase S1A, chymotrypsin                          |
| 5439           | 0.000                             | 0.000 | 2            | CG18478            | chr2L:15666351:15666251 | IPR001254       | Peptidase S1 and S6, chymotrypsin/Hap                |
|                |                                   |       |              | CG31827            | chr2L:15701348:15701248 | IPR001314       | Peptidase S1A, chymotrypsin                          |
| 5819           | 0.000                             | 0.000 | 2            | CG18477            | chr2L:15657432:15657202 | IPR001254       | Peptidase S1 and S6, chymotrypsin/Hap                |
|                |                                   |       |              | CG31780            | chr2L:15692429:15692199 | IPR001314       | Peptidase S1A, chymotrypsin                          |
| 8621           | 0.046                             | 0.061 | 2            | CG11941            | chrX:19650074:19650548  | IPR001232       | SKP1 component                                       |
|                |                                   |       |              | CG12700            | chrX:19646737:19647211  | IPR001687       | ATP/GTP-binding site motif A (P-loop)                |
| 7022           | 0.000                             | 0.005 | 2            | CG30489            | chr2R:14129753:14129132 | IPR001128       | Cytochrome P450                                      |
|                |                                   |       |              | CG33503            | chr2R:14125987:14125366 | IPR002397       | B-class P450                                         |
|                |                                   |       |              |                    |                         | IPR002401       | E-class P450, group I                                |
|                |                                   |       |              |                    |                         | IPR002403       | E-class P450, group IV                               |
| 6080           | 0.058                             | 0.962 | 2            | CG17176            | chr2L:12924758:12921215 | IPR001054       | Adenylyl cyclase class-3/4/guanylyl cyclase          |
|                |                                   |       |              | CG17174            | chr2L:12920365:12916999 | IPR002086       | Aldehyde dehydrogenase                               |

| <i>Cluster</i> | <i>Distance to tips (min/max)</i> |       | <i>Genes</i> | <i>Identifiers</i> | <i>Locations</i>        | <i>Interpro</i> | <i>Description</i>                                                      |
|----------------|-----------------------------------|-------|--------------|--------------------|-------------------------|-----------------|-------------------------------------------------------------------------|
| 6506           | 0.076                             | 0.133 | 6            | CG6489             | chr3R:8335039:8336962   | IPR001023       | Heat shock protein Hsp70                                                |
|                |                                   |       |              | CG31359            | chr3R:8331756:8333679   | IPR001472       | Bipartite nuclear localization signal                                   |
|                |                                   |       |              | CG5834             | chr3R:8328473:8330396   | IPR013126       | Heat shock protein 70                                                   |
|                |                                   |       |              | CG31449            | chr3R:19611774:19613697 |                 |                                                                         |
|                |                                   |       |              | CG31366            | chr3R:20123042:20124968 |                 |                                                                         |
|                |                                   |       |              | CG18743            | chr3R:7784510:7786436   |                 |                                                                         |
| 9375           | 0.056                             | 0.191 | 5            | CG2885             | chrX:10262716:10263301  | IPR001019       | Guanine nucleotide binding protein (G-protein), alpha subunit           |
|                |                                   |       |              | CG9807             | chrX:11756014:11756605  | IPR001687       | ATP/GTP-binding site motif A (P-loop)                                   |
|                |                                   |       |              | CG32678            | chrX:10434399:10434990  | IPR001806       | Ras GTPase                                                              |
|                |                                   |       |              | CG32671            | chrX:11428209:11428800  | IPR002078       | Sigma-54 factor, interaction region                                     |
|                |                                   |       |              | CG32673            | chrX:11717414:11718005  | IPR006689       | ARF/SAR superfamily                                                     |
| 2209           | 0.032                             | 0.105 | 2            | CG1179             | chr3L:1190925:1191345   | IPR000974       | Glycoside hydrolase, family 22, lysozyme                                |
|                |                                   |       |              | CG9118             | chr3L:22577188:22577608 | IPR001916       | Glycoside hydrolase, family 22                                          |
| 6726           | 0.012                             | 0.017 | 2            | CG18278            | chr2R:11842565:11841064 | IPR000917       | Sulfatase                                                               |
|                |                                   |       |              | CG30059            | chr2R:11837838:11836337 |                 |                                                                         |
| 6497           | 0.005                             | 0.005 | 2            | CG11659            | chr3R:12302874:12302245 | IPR000873       | AMP-dependent synthetase and ligase                                     |
|                |                                   |       |              | CG6300             | chr3R:12306932:12306300 | IPR001589       | Actin-binding, actinin-type                                             |
| 8422           | 0.029                             | 0.070 | 3            | CG12405            | chr2R:5937066:5936427   | IPR000866       | Alkyl hydroperoxide reductase/ Thiol specific antioxidant/ Mal allergen |
|                |                                   |       |              | CG12896            | chr2R:14827875:14827236 |                 |                                                                         |
|                |                                   |       |              | CG11765            | chr2R:5931339:5930700   |                 |                                                                         |
| 1665           | 0.025                             | 0.069 | 2            | CG12179            | chrX:17747191:17745276  | IPR000694       | Proline-rich region                                                     |
|                |                                   |       |              | CG12184            | chrX:17751412:17749414  | IPR001472       | Bipartite nuclear localization signal                                   |
| 7592           | 0.000                             | 0.000 | 3            | CG32500            | chrX:791496:790113      | IPR000629       | ATP-dependent helicase, DEAD-box                                        |
|                |                                   |       |              | CG32857            | chrX:797588:796221      | IPR001075       | Nitrogen-fixing NifU, C-terminal                                        |
|                |                                   |       |              | CG33502            | chrX:803680:802313      |                 |                                                                         |
| 5058           | 0.006                             | 0.017 | 2            | CG32713            | chrX:13921594:13922146  | IPR000626       | Ubiquitin                                                               |
|                |                                   |       |              | CG33223            | chrX:13912842:13913394  |                 |                                                                         |
| 5937           | 0.000                             | 0.009 | 3            | CG10530            | chr3L:17662917:17662856 | IPR000618       | Insect cuticle protein                                                  |
|                |                                   |       |              | CG18779            | chr3L:17667201:17667140 | IPR001419       | HMW glutenin                                                            |
|                |                                   |       |              | CG10534            | chr3L:17664598:17664537 |                 |                                                                         |
| 4787           | 0.000                             | 0.175 | 2            | CG11650            | chr2R:16823847:16823783 | IPR000618       | Insect cuticle protein                                                  |
|                |                                   |       |              | CG8697             | chr2R:16820513:16820451 |                 |                                                                         |
| 5784           | 0.000                             | 0.030 | 2            | CG1252             | chr3R:25376600:25376524 | IPR000618       | Insect cuticle protein                                                  |

| <i>Cluster</i> | <i>Distance to tips (min/max)</i> |       | <i>Genes</i> | <i>Identifiers</i> | <i>Locations</i>        | <i>Interpro</i> | <i>Description</i>                               |
|----------------|-----------------------------------|-------|--------------|--------------------|-------------------------|-----------------|--------------------------------------------------|
| 5962           | 0.000                             | 0.000 | 2            | CG2360             | chr3R:2529935:2529880   | IPR000618       | Insect cuticle protein                           |
|                |                                   |       |              | CG18773            | chr3L:6120668:6120980   |                 |                                                  |
|                |                                   |       |              | CG32400            | chr3L:6123539:6123851   |                 |                                                  |
| 5823           | 0.000                             | 0.000 | 2            | CG18787            | chr2L:10408738:10408683 | IPR000571       | Zinc finger, CCCH-type                           |
|                |                                   |       |              | CG18789            | chr2L:10412649:10412594 |                 |                                                  |
|                |                                   |       |              |                    |                         |                 |                                                  |
| 6715           | 0.000                             | 0.021 | 2            | CG18259            | chrX:3608596:3607158    | IPR000504       | RNA-binding region RNP-1 (RNA recognition motif) |
|                |                                   |       |              | CG6961             | chrX:3603911:3602473    | IPR001472       | Bipartite nuclear localization signal            |
|                |                                   |       |              |                    |                         |                 |                                                  |
| 3670           | 0.005                             | 0.005 | 3            | CG32820            | chrX:800987:799091      | IPR000435       | Tektin                                           |
|                |                                   |       |              | CG32819            | chrX:794895:794024      |                 |                                                  |
|                |                                   |       |              | CG17450            | chrX:807082:806208      |                 |                                                  |
| 9481           | 0.000                             | 0.000 | 2            | CG18495            | chr2R:17427090:17426563 | IPR000426       | Proteasome alpha-subunit                         |
|                |                                   |       |              | CG30382            | chr2R:17423980:17423453 | IPR001353       | 20S proteasome, A and B subunits                 |
|                |                                   |       |              |                    |                         |                 |                                                  |
| 1545           | 0.024                             | 0.091 | 2            | CG32745            | chrX:16098715:16098666  | IPR000380       | DNA topoisomerase I                              |
|                |                                   |       |              | CG3458             | chrX:16094264:16091514  | IPR001412       | Aminoacyl-tRNA synthetase, class I               |
|                |                                   |       |              |                    |                         | IPR001472       | Bipartite nuclear localization signal            |
| 7579           | 0.010                             | 0.021 | 2            | CG32164            | chr3L:16572686:16568536 | IPR006171       | TOPRIM                                           |
|                |                                   |       |              | CG32165            | chr3L:16564999:16560858 | IPR000357       | HEAT                                             |
|                |                                   |       |              |                    |                         | IPR001494       | Importin-beta, N-terminal                        |
| 3310           | 0.049                             | 0.185 | 2            | CG18412            | chrX:20240674:20232218  | IPR000354       | Involucrin repeat                                |
|                |                                   |       |              | CG3895             | chrX:20250617:20246548  | IPR001660       | Sterile alpha motif SAM                          |
|                |                                   |       |              |                    |                         | IPR001778       | Pollen allergen Poa pIX/Phl pVI, C-terminal      |
| 9341           | 0.000                             | 0.000 | 2            | CG18816            | chr2R:2511295:2510994   | IPR011510       | Sterile alpha motif homology 2                   |
|                |                                   |       |              | CG30160            | chr2R:2517583:2517282   | IPR000301       | CD9/CD37/CD63 antigen                            |
|                |                                   |       |              |                    |                         |                 |                                                  |
| 6922           | 0.010                             | 0.036 | 2            | CG6289             | chr3L:20277750:20276901 | IPR000215       | Proteinase inhibitor I4, serpin                  |
|                |                                   |       |              | CG6663             | chr3L:20255891:20255042 |                 |                                                  |
|                |                                   |       |              |                    |                         |                 |                                                  |
| 6349           | 0.000                             | 0.000 | 2            | CG7216             | chr2L:14666477:14666359 | IPR000175       | Sodium:neurotransmitter symporter                |
|                |                                   |       |              | CG31904            | chr2L:14672628:14671497 |                 |                                                  |
|                |                                   |       |              |                    |                         |                 |                                                  |
| 8028           | 0.067                             | 0.068 | 2            | CG7045             | chr3R:18317648:18318026 | IPR000135       | High mobility group proteins HMG1 and HMG2       |
|                |                                   |       |              | CG7046             | chr3R:18318984:18319383 | IPR000910       | HMG1/2 (high mobility group) box                 |
|                |                                   |       |              |                    |                         |                 |                                                  |
| 6907           | 0.000                             | 0.000 | 2            | CG4220             | chr2L:8015835:8000240   | IPR000104       | Antifreeze protein, type I                       |
|                |                                   |       |              | CG4220-RC          | chr2L:8015895:7999467   | IPR006162       | Phosphopantetheine attachment site               |
|                |                                   |       |              |                    |                         | IPR007087       | Zinc finger, C2H2-type                           |

| <i>Cluster</i> | <i>Distance to tips (min/max)</i> |       | <i>Genes</i> | <i>Identifiers</i> | <i>Locations</i>        | <i>Interpro</i> | <i>Description</i>                               |
|----------------|-----------------------------------|-------|--------------|--------------------|-------------------------|-----------------|--------------------------------------------------|
| 2262           | 0.000                             | 0.074 | 2            | CG10102            | chr2R:10890134:10889985 | IPR000104       | Antifreeze protein, type I                       |
|                |                                   |       |              | CG12505            | chr2R:10891722:10892484 | IPR005162       | Retrotransposon gag protein                      |
| 1969           | 0.000                             | 0.165 | 2            | CG4575             | chrX:6796016:6795797    | IPR000104       | Antifreeze protein, type I                       |
|                |                                   |       |              | CG7952             | chrX:19939509:19939434  | IPR001472       | Bipartite nuclear localization signal            |
|                |                                   |       |              |                    |                         | IPR004827       | Basic-leucine zipper (bZIP) transcription factor |
|                |                                   |       |              |                    |                         | IPR011700       | Basic leucine zipper                             |
| 5912           | 0.000                             | 0.000 | 2            | CG8118-RC          | chr2R:9574675:9554330   | IPR000104       | Antifreeze protein, type I                       |
|                |                                   |       |              | CG8118             | chr2R:9573168:9527088   | IPR000817       | Prion protein                                    |
|                |                                   |       |              |                    |                         | IPR001419       | HMW glutenin                                     |
|                |                                   |       |              |                    |                         | IPR001472       | Bipartite nuclear localization signal            |
|                |                                   |       |              |                    |                         | IPR002952       | Eggshell protein                                 |
| 5067           | 0.069                             | 0.075 | 2            | CG17438            | chrX:13118766:13119882  | IPR000104       | Antifreeze protein, type I                       |
|                |                                   |       |              | CG32703            | chrX:13116157:13113988  | IPR000719       | Protein kinase                                   |
|                |                                   |       |              |                    |                         | IPR001472       | Bipartite nuclear localization signal            |
|                |                                   |       |              |                    |                         | IPR001859       | Ribosomal protein P2                             |
|                |                                   |       |              |                    |                         | IPR003527       | MAP kinase                                       |
|                |                                   |       |              |                    |                         | IPR008271       | Serine/threonine protein kinase, active site     |
| 6983           | 0.052                             | 0.073 | 2            | CG18284            | chr2L:10645369:10644150 | IPR000073       | Alpha/beta hydrolase fold-1                      |
|                |                                   |       |              | CG31872            | chr2L:10642997:10642093 | IPR000379       | Esterase/lipase/thioesterase                     |
|                |                                   |       |              |                    |                         | IPR006693       | AB-hydrolase associated lipase region            |
|                |                                   |       |              |                    |                         | IPR008262       | Lipase, active site                              |
| 2172           | 0.000                             | 0.000 | 2            | CG31292            | chr3R:11732308:11732249 |                 |                                                  |
|                |                                   |       |              | CG3303             | chr3R:11735365:11734441 |                 |                                                  |
| 399            | 0.016                             | 0.033 | 2            | CG12487            | chr3L:8860570:8860804   |                 |                                                  |
|                |                                   |       |              | CG13465            | chr3L:8862346:8862580   |                 |                                                  |
| 6188           | 0.016                             | 0.067 | 2            | CG15797            | chrX:9101663:9101598    |                 |                                                  |
|                |                                   |       |              | CG15910            | chrX:9105917:9105716    |                 |                                                  |
| 6613           | 0.000                             | 0.000 | 2            | CG33470            | chr2R:8928632:8927728   |                 |                                                  |
|                |                                   |       |              | CG18279            | chr2R:8923905:8923001   |                 |                                                  |
| 6817           | 0.000                             | 0.000 | 2            | CG18542            | chr3R:5511968:5511693   |                 |                                                  |
|                |                                   |       |              | CG32939            | chr3R:5519288:5519013   |                 |                                                  |
| 7435           | 0.000                             | 0.000 | 2            | CG18064            | chr3L:5337040:5337193   |                 |                                                  |
|                |                                   |       |              | CG32197            | chr3L:5334274:5334427   |                 |                                                  |
| 7528           | 0.000                             | 0.000 | 2            | CG31131            | chr3R:4116178:4117288   |                 |                                                  |

| <i>Cluster</i> | <i>Distance to tips (min/max)</i> |       | <i>Genes</i> | <i>Identifiers</i> | <i>Locations</i>        | <i>Interpro</i> | <i>Description</i> |
|----------------|-----------------------------------|-------|--------------|--------------------|-------------------------|-----------------|--------------------|
| 7764           | 0.000                             | 0.000 | 2            | CG31253            | chr3R:4118797:4119934   |                 |                    |
|                |                                   |       |              | CG31825            | chr2L:6753287:6753815   |                 |                    |
|                |                                   |       |              | CG33311            | chr2L:6719690:6720218   |                 |                    |
| 7785           | 0.000                             | 0.005 | 2            | CG31865            | chr2L:11997767:11997703 |                 |                    |
|                |                                   |       |              | CG31866            | chr2L:11993856:11993792 |                 |                    |
| 8224           | 0.000                             | 0.012 | 2            | CG3176             | chrX:339339:339255      |                 |                    |
|                |                                   |       |              | CG32817            | chrX:336851:336767      |                 |                    |
| 8539           | 0.028                             | 0.029 | 2            | CG10476            | chr2R:5966703:5967369   |                 |                    |
|                |                                   |       |              | CG18606            | chr2R:14802884:14803511 |                 |                    |
| 8937           | 0.011                             | 0.026 | 3            | CG32783            | chrX:3792885:3790610    |                 |                    |
|                |                                   |       |              | CG32786            | chrX:3788689:3786414    |                 |                    |
|                |                                   |       |              | CG2941             | chrX:3784451:3782176    |                 |                    |
| 8950           | 0.000                             | 0.000 | 2            | CG31447            | chr3R:12815240:12814690 |                 |                    |
|                |                                   |       |              | CG31274            | chr3R:12819452:12819388 |                 |                    |

*Table S5: Genes recently duplicated in the D. melanogaster lineage. If there are several lineage specific duplications within one family, all members are shown. The distance to tip refers to the minimum and maximum distance (in  $d_s$ ) to any tip from the earliest duplication event. The last two columns show Interpro annotations (Mulder et al. 2005).*

## Benchmarking against *D. pseudoobscura* gene set

Benchmarking tests were performed against the predicted gene set from release 1.04 of *D. pseudoobscura* (Richards et al. 2005). Briefly, this set was derived computationally by applying TBLASTN, Genewise (Birney et al. 2004), Genscan (Burge and Karlin 1997) and Twinscan (Korf et al. 2001). Genes were accepted if they were detected by TBLASTN and at least one of the other methods and template and prediction were reciprocal best matches.

After removing genes on unplaced contigs the reference gene set contained 9,946 genes with 39,580 exons. Sensitivity and selectivity on the nucleotide, exon and gene level were calculated as in Burset and Guigo 1996 (Burset and Guigo 1996) with a relaxed criterion for matching exons: two overlapping exons between the sets were declared to match if they shared at least one exon boundary within nine nucleotides. Variant exons and transcripts for a single gene were compared individually to the reference, but counted as a single entry.

Representative template transcripts were compared against the unmasked genome using TBLASTN and an E-Value upper threshold of  $10^{-5}$ .

The pipeline predicts 83% of transcripts of the published prediction set from *D. pseudoobscura* r1.04, 72% of these predictions are identical. Only 2% of transcripts in the reference set do not overlap with any transcript in the predicted set. The amount of overlap between the two gene prediction sets is expected given that both are derived from different computational methods.

5% of exons in the reference set are missing. Of the missing exons, 28% are in missed genes and 55% are terminal exons at either end of a gene. In most cases these extra exons are not part of the template used for the prediction and are likely spurious exons from ab-initio predictions.

We compared the performance of exonerate in the initial scanning step and compared it to TBLASTN using the annotations from *D. pseudoobscura* release 1.04. Exonerate needs to be run at low levels of nucleotide specificity in order to obtain a level of sensitivity comparable to TBLASTN. The gene model in exonerate allows it to predict exon boundaries in scanning mode with high sensitivity (92%). TBLASTN lacks such a model and only predicts 60% of exons correct. Again, Exonerate's selectivity is low. Exonerate can replace TBLASTN as a method to locate exons and genes, but its result set needs to be filtered for spurious matches.

Benchmarking showed Exonerate to be 1.7 times slower than TBLASTN, but execution speed is highly dependent on parameter choices and can be increased using the default parameters.

| Category             | Nucleotides |      | Exons |      |      |      | Genes |      |      |      |
|----------------------|-------------|------|-------|------|------|------|-------|------|------|------|
|                      | sp          | sn   | sp    | sn   | me   | we   | sp    | sn   | mg   | wg   |
| Exonerate50          | 0.21        | 0.94 | 0.06  | 0.95 | 0.02 | 0.87 | -     | -    | -    | -    |
| Exonerate60          | 0.64        | 0.88 | 0.41  | 0.93 | 0.06 | 0.59 | -     | -    | -    | -    |
| Exonerate70          | 0.73        | 0.87 | 0.64  | 0.92 | 0.06 | 0.37 | -     | -    | -    | -    |
| Exonerate80          | 0.74        | 0.87 | 0.66  | 0.91 | 0.07 | 0.34 | -     | -    | -    | -    |
| Tblastn              | 0.67        | 0.94 | 0.69  | 0.80 | 0.10 | 0.35 | -     | -    | -    | -    |
| Pipeline (all genes) | 0.73        | 0.95 | 0.69  | 0.92 | 0.05 | 0.30 | 0.48  | 0.83 | 0.02 | 0.52 |
| Pipeline (CG,PG,SG)  | 0.78        | 0.83 | 0.75  | 0.81 | 0.17 | 0.25 | 0.64  | 0.75 | 0.14 | 0.36 |

Table T6: Gene prediction quality indices for predictions in *D. pseudoobscura*.

## References

- Alexeyenko A., Tamas I., Liu G., Sonnhammer E.L.L. 2006. Automatic clustering of orthologs and inparalogs shared by multiple proteomes. *Bioinformatics* **22**: e9-15.
- Birney E., Clamp M., Durbin R. (2004) Genewise and genomewise. *Genome Res* **14**: 988-995.
- Boyle E.I., Weng S., Gollub J., Jin H., Botstein D., Cherry J.M., Sherlock G. 2004. GO::TermFinder--open source software for accessing Gene Ontology information and finding significantly enriched Gene Ontology terms associated with a list of genes. *Bioinformatics* **20**: 3710-3715.
- Burge C., Karlin S. (1997) Prediction of complete gene structures in human genomic dna. *J Mol Biol* **268**: 78-94.
- Burset M., Guigo R. (1996) Evaluation of gene structure prediction programs. *Genomics* **34**: 353-367.
- Castresana J. 2000. Selection of conserved blocks from multiple alignments for their use in phylogenetic analysis. *Mol Biol Evol* **17**: 540-552.
- Chen R., Meisel R.P. et al. (2005) Comparative genome sequencing of drosophila pseudoobscura: chromosomal, gene, and cis-element evolution. *Genome Res* **15**: 1-18.
- Finn R.D., Mistry J., Schuster-Bockler B., Griffiths-Jones S., Hollich V., Lassmann T., Moxon S., Marshall M., Khanna A., Durbin R. et al. (2006) Pfam: clans, web tools and services. *Nucleic Acids Res* **34**: D247-51.
- Edgar R.C. 2004. MUSCLE: multiple sequence alignment with high accuracy and high throughput. *Nucleic Acids Res* **32**: 1792-1797.
- Felsenstein J. 1981. Evolutionary trees from DNA sequences: a maximum likelihood approach. *J Mol Evol* **17**: 368-376.
- Felsenstein J. 1989. PHYLIP - Phylogeny inference package (version 3.2). *Cladistics* **5**: 164-166.
- Fitch W.M. 1970. Distinguishing homologous from analogous proteins. *Syst Zool* **19**: 99-113.
- Korf I., Flicek P., Duan D., Brent M.R. (2001) Integrating genomic homology into gene structure prediction. *Bioinformatics* **17 Suppl 1**: S140-8.
- Morgenstern B. 1999. DIALIGN 2: improvement of the segment-to-segment approach to multiple sequence alignment. *Bioinformatics* **15**: 211-218.
- Mulder N.J., Apweiler R., Attwood T.K., Bairoch A., Bateman A., Binns D., Bradley P., Bork P., Bucher P., Cerutti L. et al. (2005) Interpro, progress and status in 2005. *Nucleic Acids Res* **33**: D201-5.
- Remm M., Storm C.E., Sonnhammer E.L. 2001. Automatic clustering of orthologs and in-paralogs from pairwise species comparisons. *J Mol Biol* **314**: 1041-1052.
- Richards S., Liu Y., Bettencourt B.R., Hradecky P., Letovsky S., Nielsen R., Thornton K., Hubisz M.J., Nielsen R., Yang Z. 1998. Likelihood models for detecting positively selected amino acid sites and applications to the HIV-1 envelope gene. *Genetics* **148**: 929-936.
- Tatusov R.L., Koonin E.V., Lipman D.J. 1997. A genomic perspective on protein families. *Science* **278**: 631-637.
- Suzuki Y., Gojobori T. 1999. A method for detecting positive selection at single amino acid sites. *Mol Biol Evol* **16**: 1315-1328.
- Suzuki Y., Nei M. 2004. False-positive selection identified by ML-based methods: examples from the Sig1 gene of the diatom *Thalassiosira weissflogii* and the tax gene of a human T-cell lymphotropic virus. *Mol Biol Evol* **21**: 914-921.



Wong W.S.W., Yang Z., Goldman N., Nielsen R. 2004. Accuracy and power of statistical methods for detecting adaptive evolution in protein coding sequences and for identifying positively selected sites. *Genetics* **168**: 1041-1051.

Wootton J.C. 1994. Non-globular domains in protein sequences: automated segmentation using complexity measures. *Comput Chem* **18**: 269-285.

Yang Z. 1997. PAML: a program package for phylogenetic analysis by maximum likelihood. *Comput Appl Biosci* **13**: 555-556.

Zmasek C.M., Eddy S.R. 2002. RIO: analyzing proteomes by automated phylogenomics using resampled inference of orthologs. *BMC Bioinformatics* **3**: 14.

Zuckerkandl E., Pauling L (1962) Molecular disease, evolution, and genetic heterogeneity. In: *Horizons in biochemistry* (ed. M. Kasha, B. Pullman), pp. 189–225. Academic Press, New York.
